# Supplementary material for: Activation and Identification of a Griseusin Cluster in Streptomyces sp. CA-256286 by Employing Transcriptional Regulators and Multi-Omics Methods
Source: MDPI journal article supplement (doi:10.3390/molecules26216580), 2021-10-30
Supplement: s1 [file s1]

# Activation and identification of a griseusin cluster in *Streptomyces* sp. CA-256286 by employing transcriptional regulators and multi-omics methods

Charlotte Beck<sup>1†</sup>, Tetiana Gren<sup>1†</sup>, Francisco Javier Ortiz-López<sup>2†</sup>, Tue Sparholt Jørgensen<sup>1</sup>, Daniel Carretero-Molina<sup>2</sup>, Jesús Martín Serrano<sup>2</sup>, José R. Tormo<sup>2</sup>, Daniel Oves-Costales<sup>2</sup>, Eftychia E. Kontou<sup>1</sup>, Omkar S. Mohite<sup>1</sup>, Erik Mingyar<sup>3,4</sup>, Evi Stegmann<sup>3,4</sup>, Olga Genilloud<sup>2\*</sup> and Tilmann Weber<sup>1\*</sup>

## Affiliations

1. The Novo Nordisk Foundation Center for Biosustainability, Technical University of Denmark, Kemitorvet, Building 220, 2800 Kgs. Lyngby, Denmark; chabec@biosustain.dtu.dk (C.B.); tetgre@biosustain.dtu.dk (T.G.); tuspjo@biosustain.dtu.dk (T.S.J.); eeko@biosustain.dtu.dk (E.E.K.); omkmoh@biosustain.dtu.dk (O.S.M.)
  2. Fundación MEDINA, Centro de Excelencia en Investigación de Medicamentos Innovadores en Andalucía, Parque Tecnológico de Ciencias de la Salud, Av. Conocimiento, 34, 18016 Granada, Spain ; ja-vier.ortiz@medinaandalucia.es (F.J.O.-L.); daniel.carretero@medinaandalucia.es (D.C.-M.); je-sus.martin@medinaandalucia.es (J.M.S.); ruben.tormo@medinaandalucia.es (J.R.T.); da-niel.oves@medinaandalucia.es (D.O.-C.)
  3. Department of Microbial Bioactive Compounds, Interfaculty Institute of Microbiology and Infection Medicine, Eberhard Karls Universität Tübingen, Auf der Morgenstelle 28, 72076 Tübingen, Germany; erik.mingyar@gmail.com (E.M.); evi.stegmann@biotech.uni-tuebingen.de (E.S.)
  4. German Center for Infection Research (DZIF), Partner Site Tübingen, 72076 Tübingen, Germany
- \* Correspondence: olga.genilloud@medinaandalucia.es (O.G.); tiwe@biosustain.dtu.dk (T.W.); Tel.: +45-24-89-61-32 (T.W.)
- † Author contributed equally to the study.

## Supplementary Information

|                                                                              |    |
|------------------------------------------------------------------------------|----|
| Supplementary information 1: Structure elucidation.....                      | 1  |
| Supplementary information 2: Bioactivity testing.....                        | 19 |
| Supplementary information 3: antiSMASH prediction.....                       | 20 |
| Supplementary information 4: Replicates and samples for omics analyses ..... | 21 |
| Supplementary information 5: Transcriptomics .....                           | 22 |
| Supplementary information 6: LC-MS analyses .....                            | 23 |
| Supplementary information 7: BLAST analyses.....                             | 31 |
| Supplementary information 8: Biosynthesis of griseusins .....                | 32 |
| Supplementary information 9: BGC 1.31.....                                   | 33 |

## Supplementary information 1: Structure elucidation

**a**

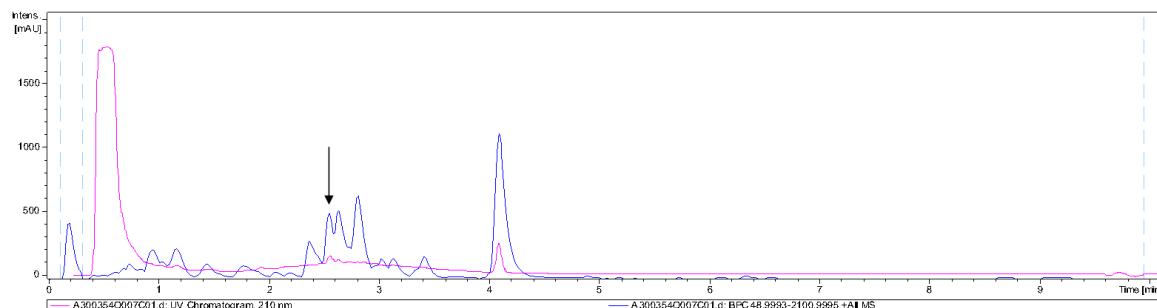

**b**

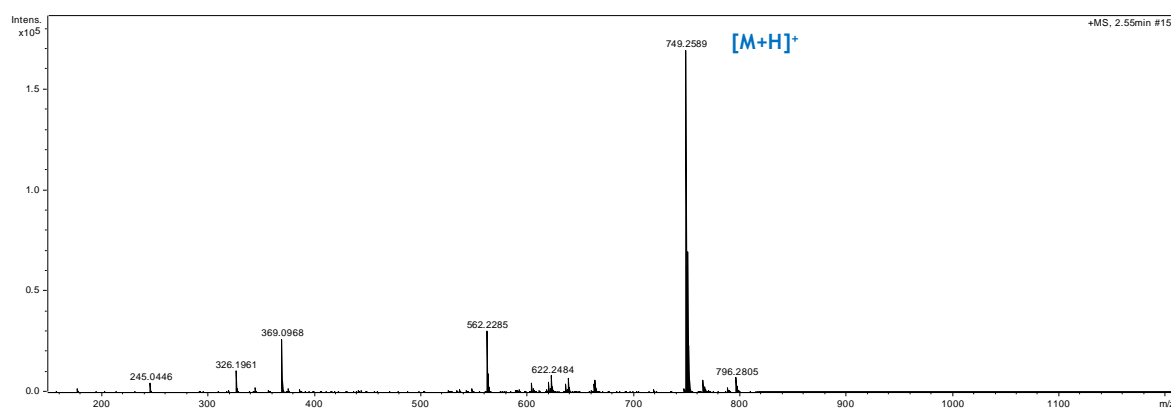

**c**

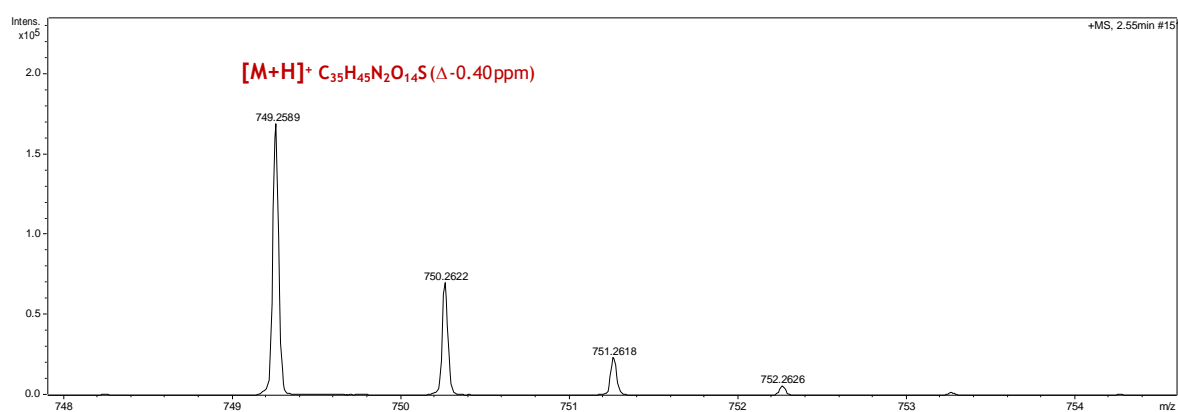

**Figure S1: a)** LC-UV-HRMS chromatogram (UV 210 nm: pink trace; MS<sup>+</sup>: blue trace) of culture broth extract of CA-300354 (*Streptomyces* sp. CA-256286 with pRM4-SARPs) in MO16 medium. **b)** HRESIMS(+)-TOF spectrum at rt: 2.55 min. **c)** [M+H]<sup>+</sup> adduct and molecular formula of **1**

**a**

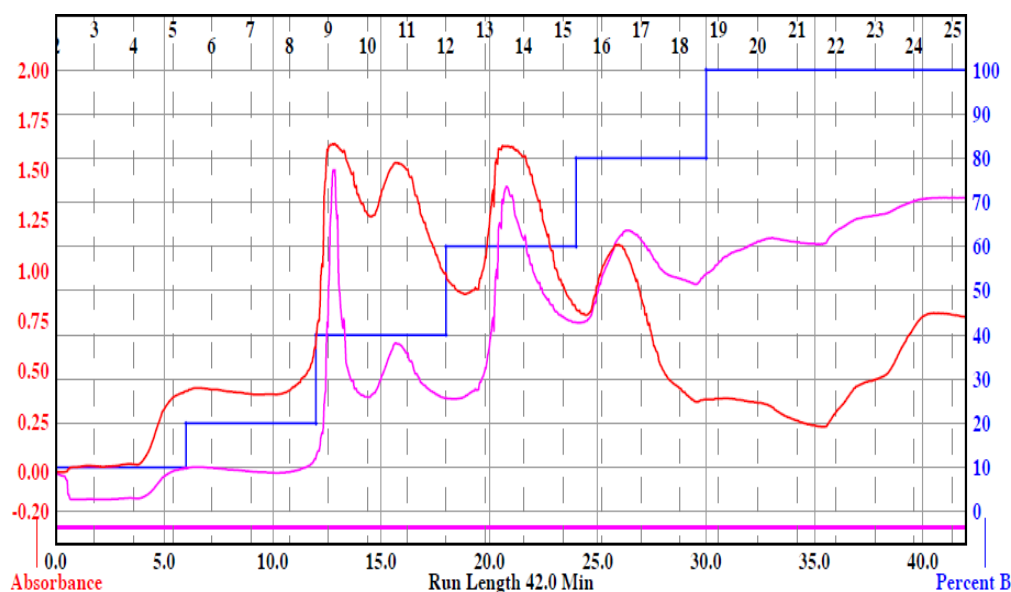

**b**

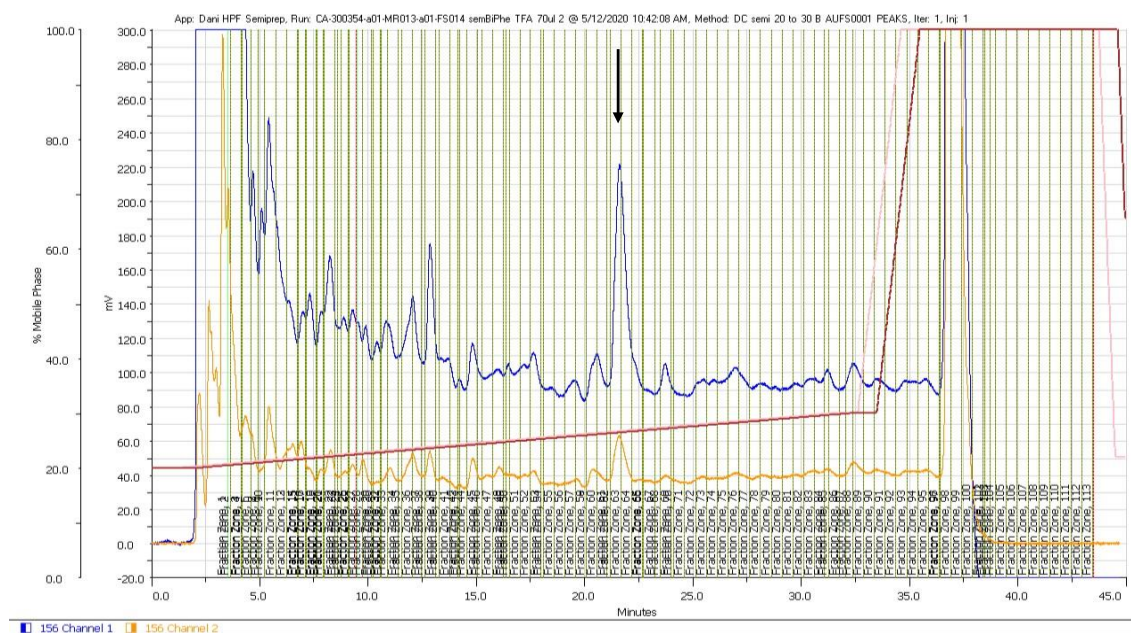

**Figure S2:** Targeted isolation of **1** ( $M+H^+$ :  $m/z$  749.26) of culture broth extracts of CA-300354 (*Streptomyces* sp. CA-256286 with pRM4-SARPs) regrowth. **a)** MPLC chromatogram. **b)** Further purification by semipreparative HPLC

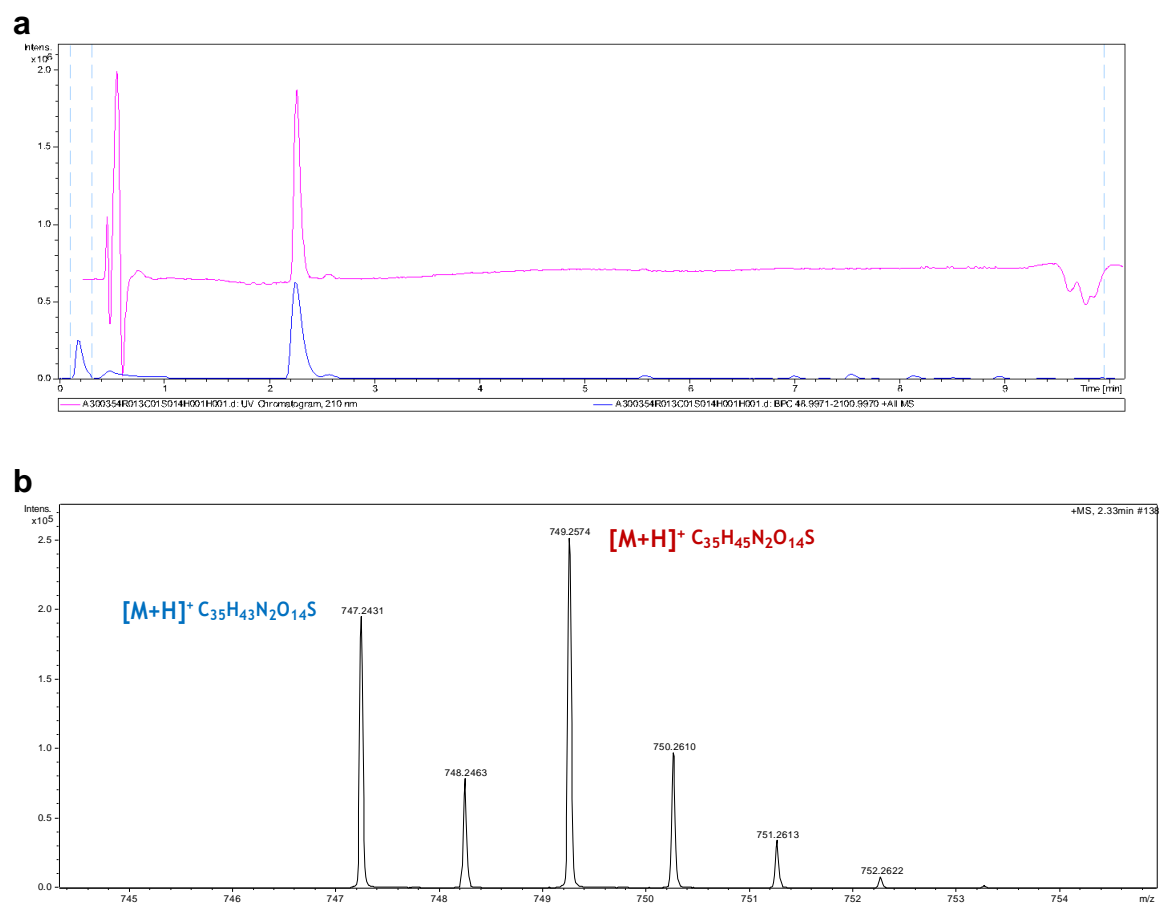

**Figure S3: a)** LC-UV-HRMS chromatogram (UV 210 nm: pink trace; MS+: blue trace) of peak collected by targeted isolation. **b)** HRESIMS(+)-TOF spectrum of peak collected by targeted isolation revealed the presence of two species, the compound **1** and its oxidized version **2**.

**a**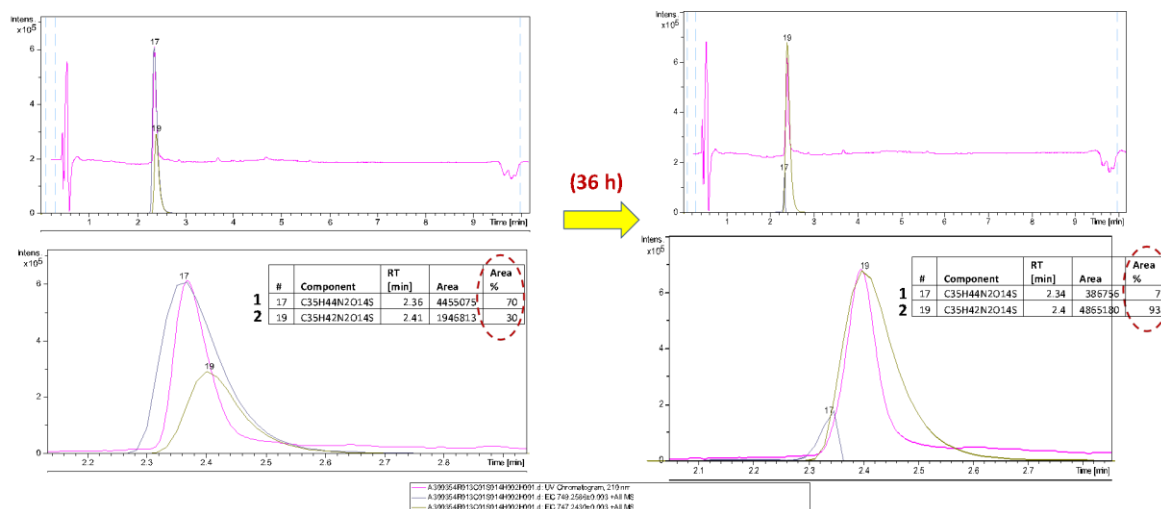**b**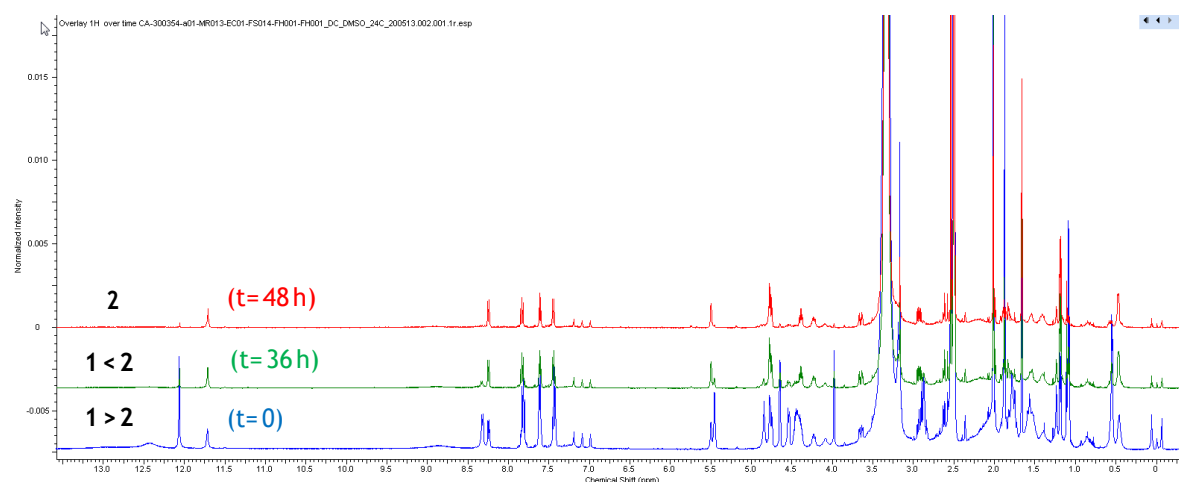

**Figure S4:** Conversion over time of **1** into **2** (oxidation) monitored by HRMS (a) and <sup>1</sup>H-NMR (DMSO-d<sub>6</sub>, 500 MHz) (b)

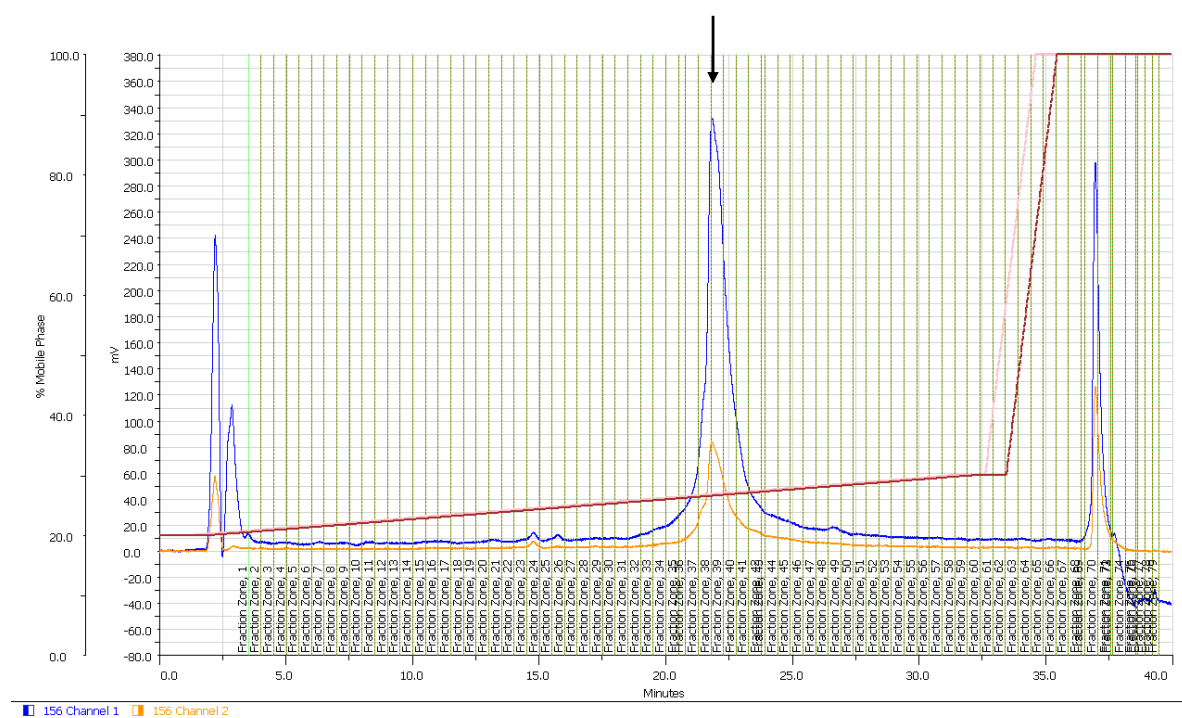

**Figure S5:** Scale-up purification of **2** by semipreparative HPLC

**a**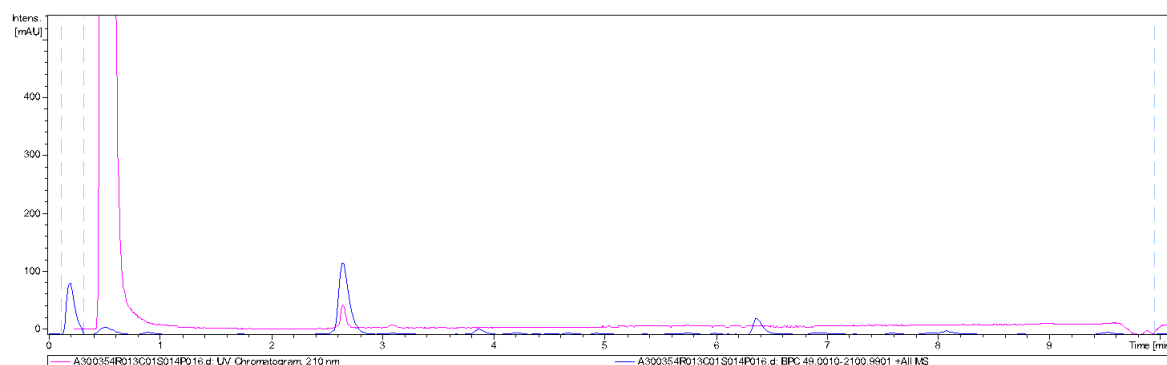**b**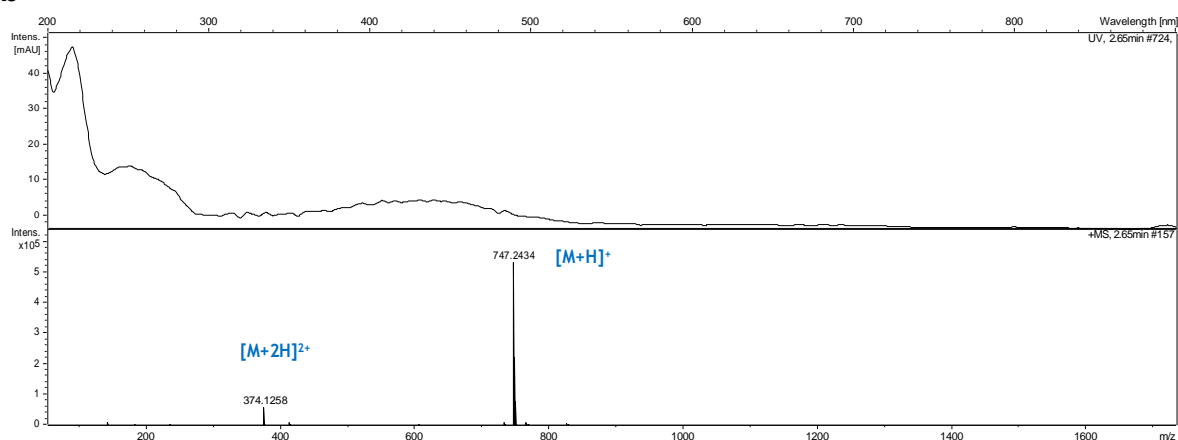**c**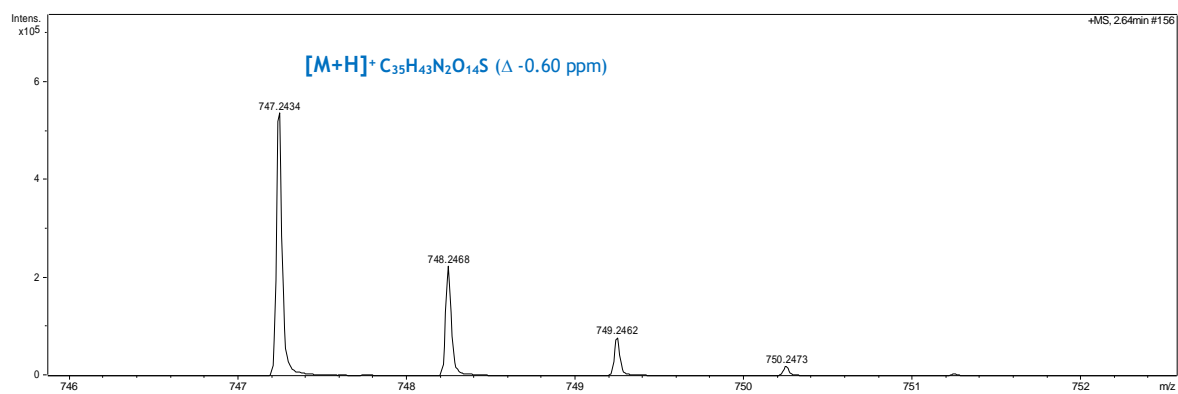

**Figure S6: a)** LC-UV-HRMS chromatogram (UV 210 nm: pink trace; MS+: blue trace) of pure **2**. **b)** HRESIMS(+)-TOF spectrum of pure **2**. **c)**  $[M+H]^+$  adduct and molecular formula of **2**.

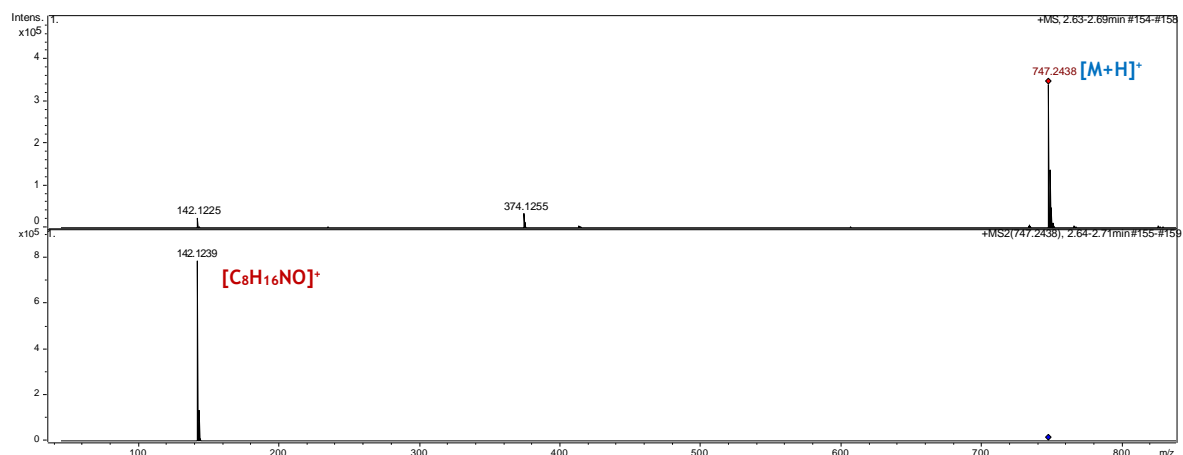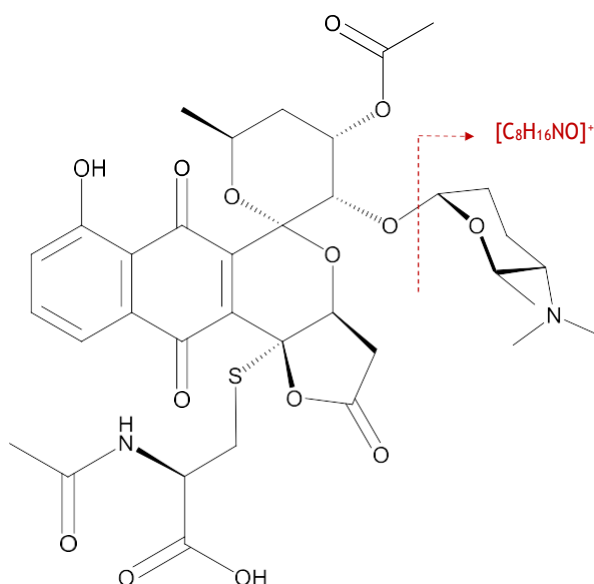

**Figure S7:** MS/MS fragmentation of [M+H]<sup>+</sup> adduct of **2**. Final structure of **2** and the loss of forosamine moiety are shown



**a**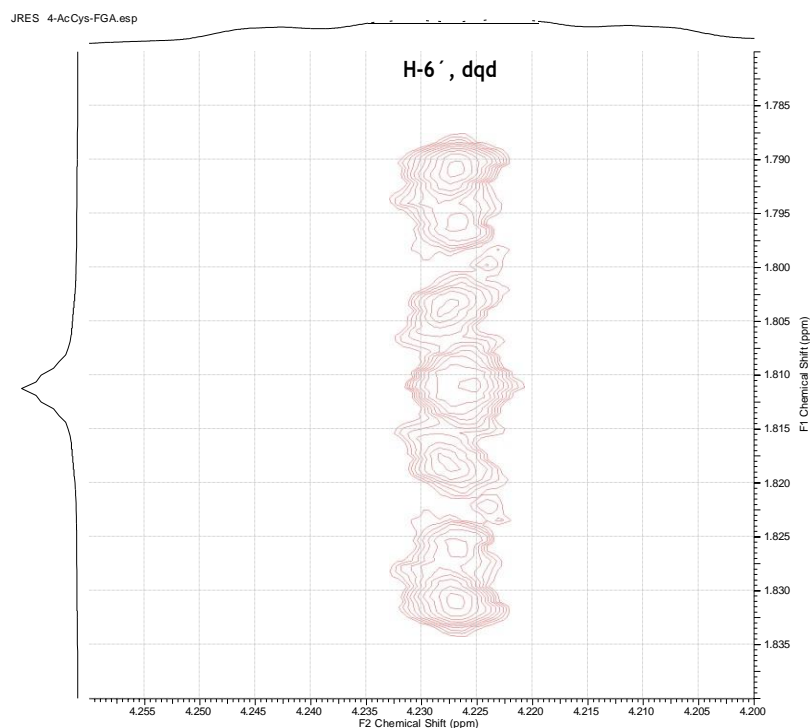**b**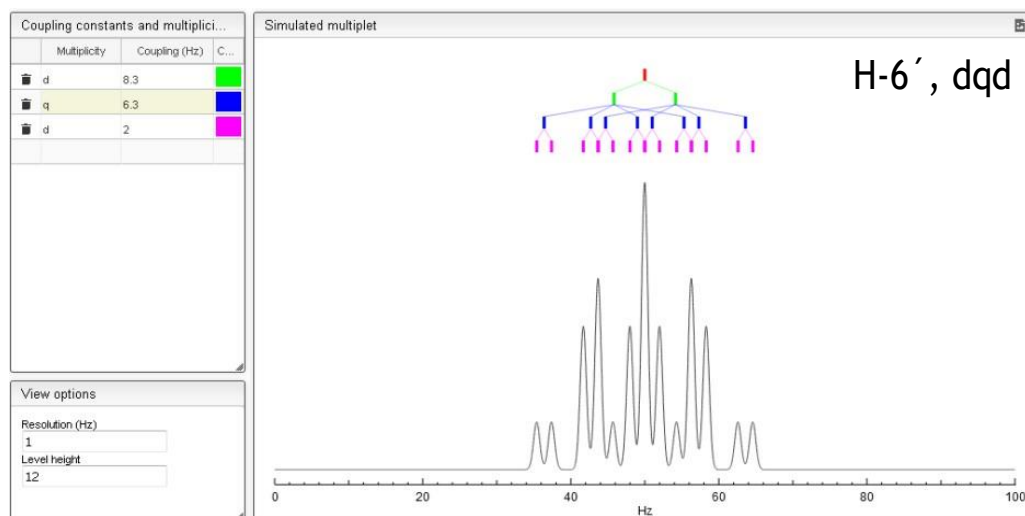

**Figure S8: a)** H-6' proton signal in JRES spectrum of **2**. **b)** Multiplet simulation [1] for H-6' (applied values for  $^1\text{H}$ - $^1\text{H}$  coupling constants are indicated) showing good fitting with the multiplicity experimentally observed.

**a**

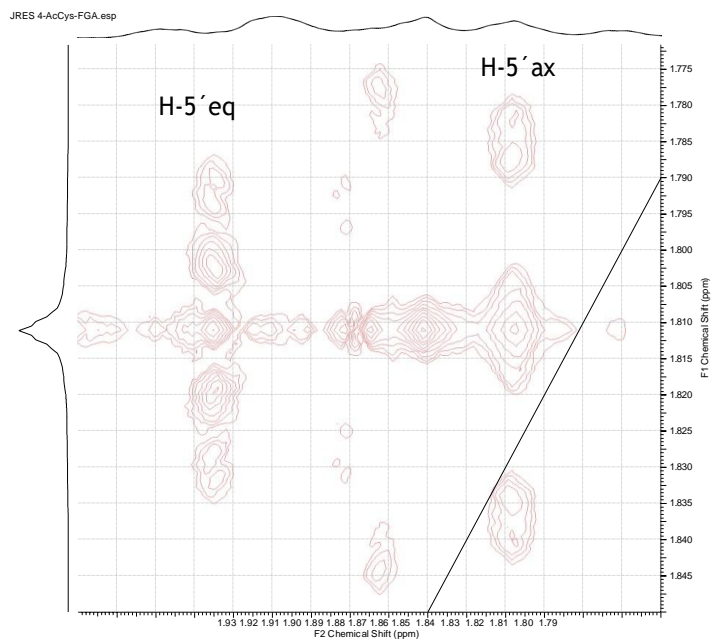

**b**

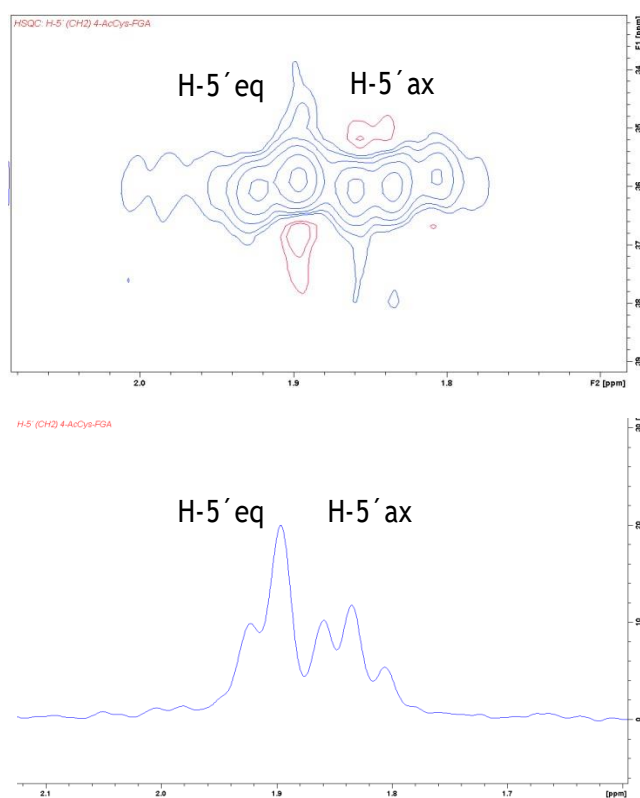

**Figure S9: a)** H-5'eq and H-5'ax methylene proton signals in JRES spectrum of **2**. **b)** Horizontal HSQC traces for H-5'eq and H-5'ax protons in **2**, obtained after Gaussian multiplication.[2]. Although  $^1\text{H}$ - $^1\text{H}$  coupling constants could not be accurately measured, the proton with higher multiplicity was reasonably assigned to H-5'ax.

**a**

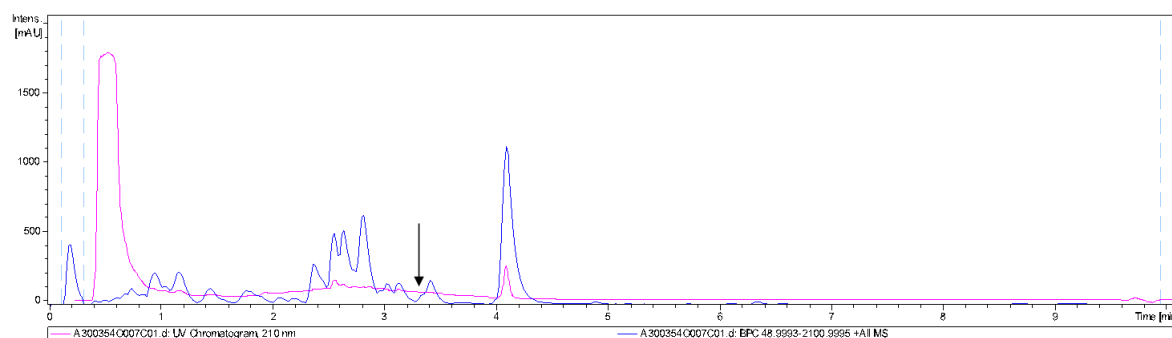

**b**

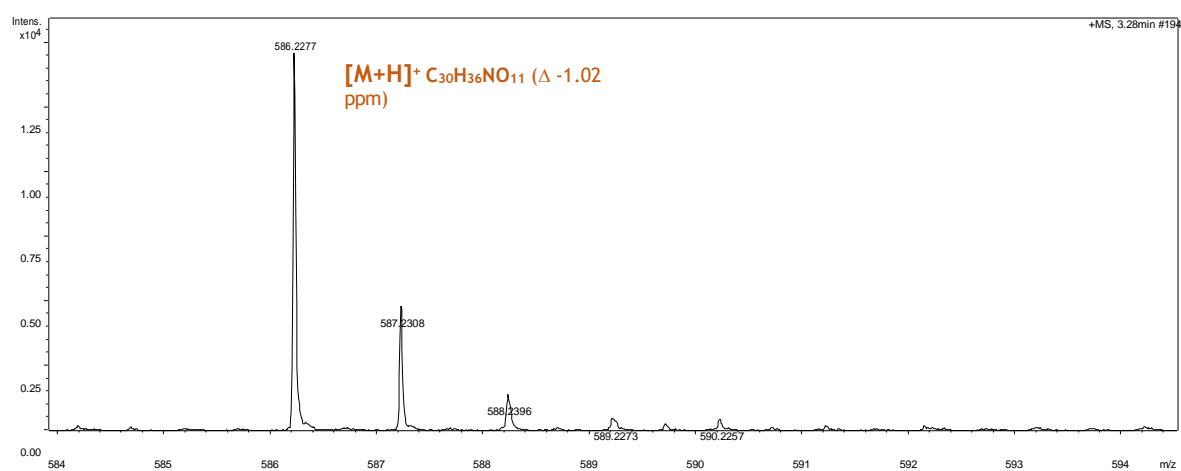

**Figure S10:** LC-UV-HRMS chromatogram (UV 210 nm: pink trace; MS+: blue trace) of culture broth extract of CA-300354 (*Streptomyces* sp. CA-256286 with pRM4-SARPs) in MO16 medium. **b)** HRESIMS(+)-TOF spectrum at rt: 3.28 min.,  $[M+H]^+$  adduct and molecular formula of **3**

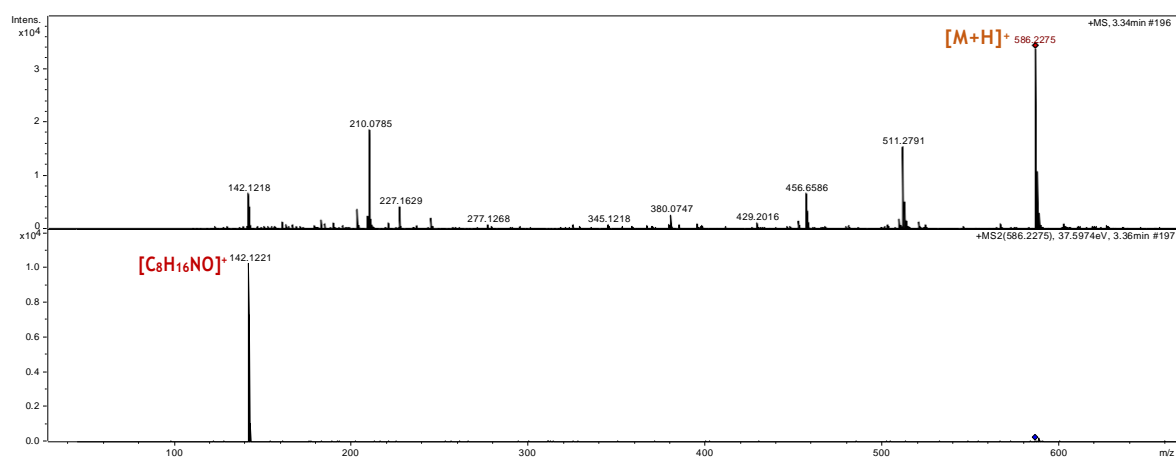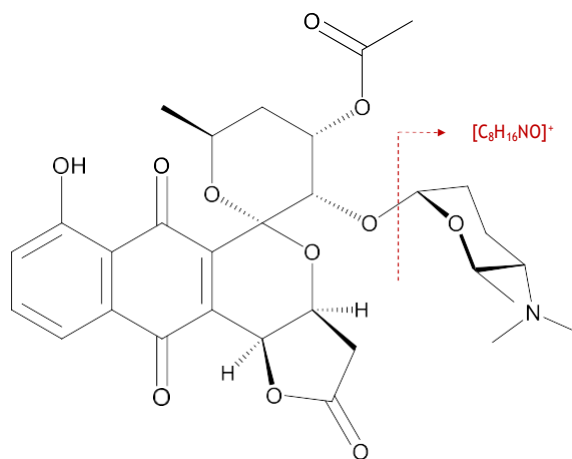

**Figure S11:** MS/MS fragmentation of  $[M+H]^+$  adduct of **3**. The loss of forosamine moiety is shown.

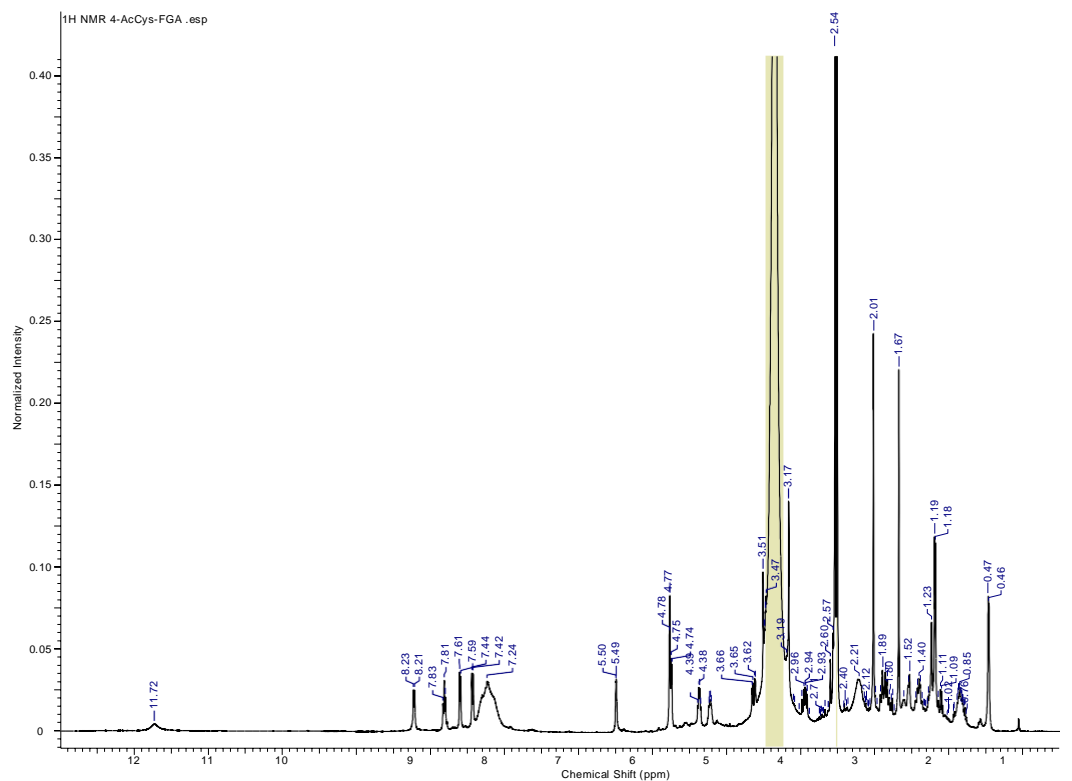

**Figure S12:**  $^1\text{H}$ -NMR spectrum (DMSO- $d_6$ , 500 MHz) of 4-AcCys-FGA (**2**)

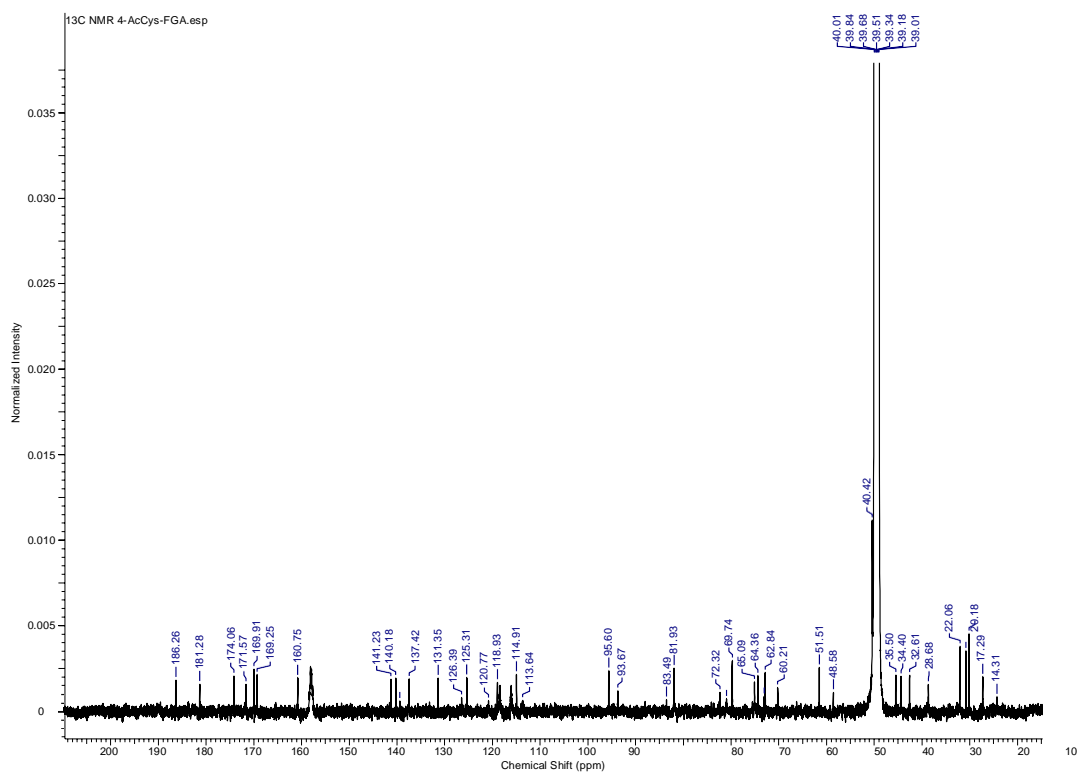

**Figure S13:**  $^{13}\text{C}$ -NMR spectrum (DMSO- $d_6$ , 500 MHz) of 4-AcCys-FGA (**2**)

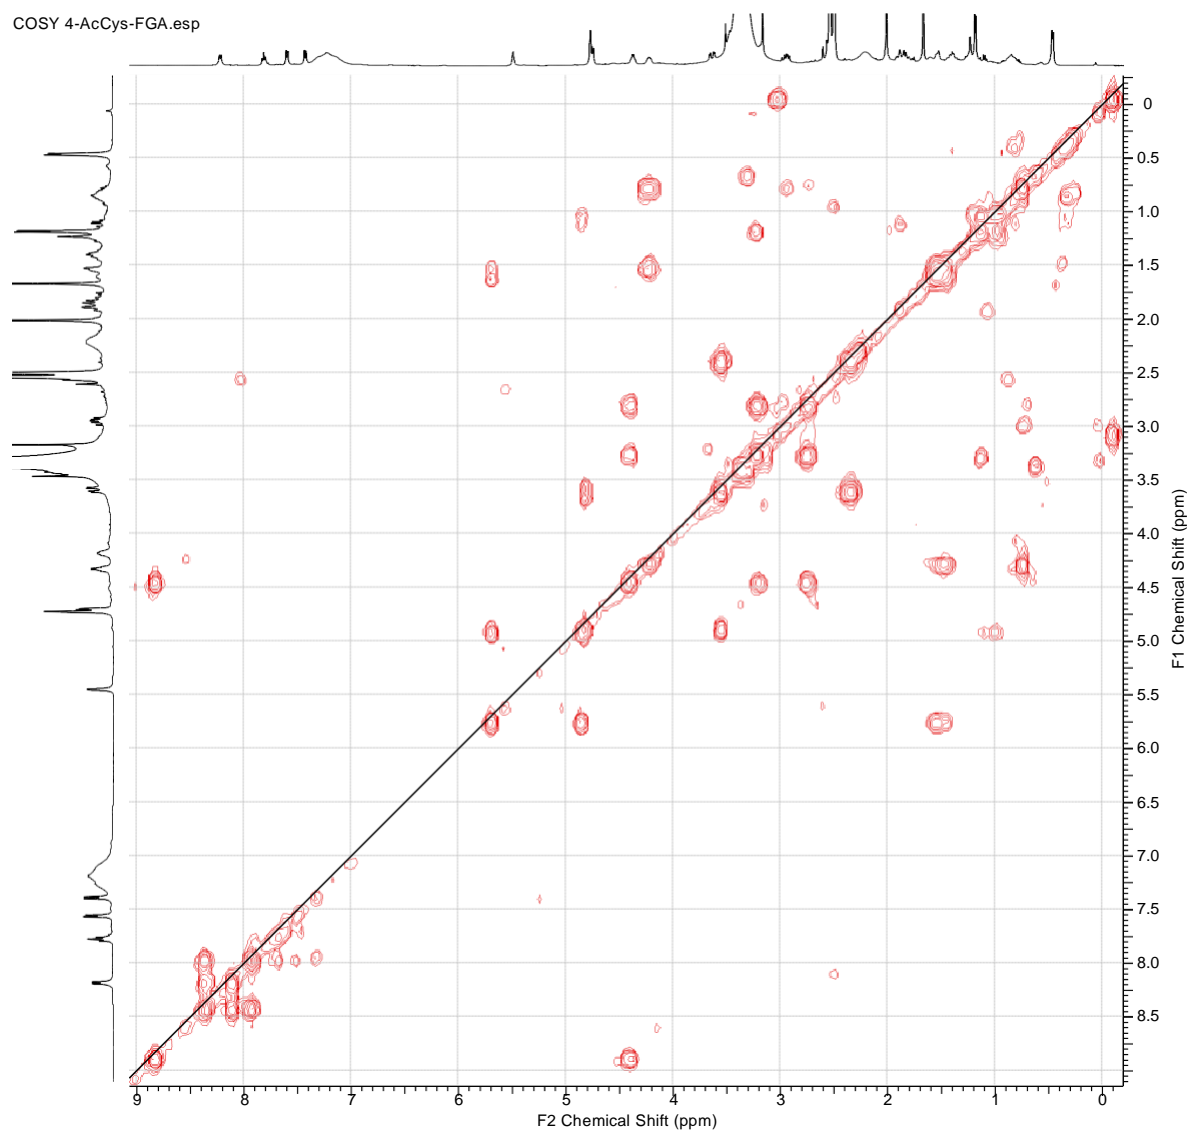

**Figure S14:** COSY spectrum (DMSO-*d*<sub>6</sub>, 500 MHz) of 4-AcCys-FGA (**2**)

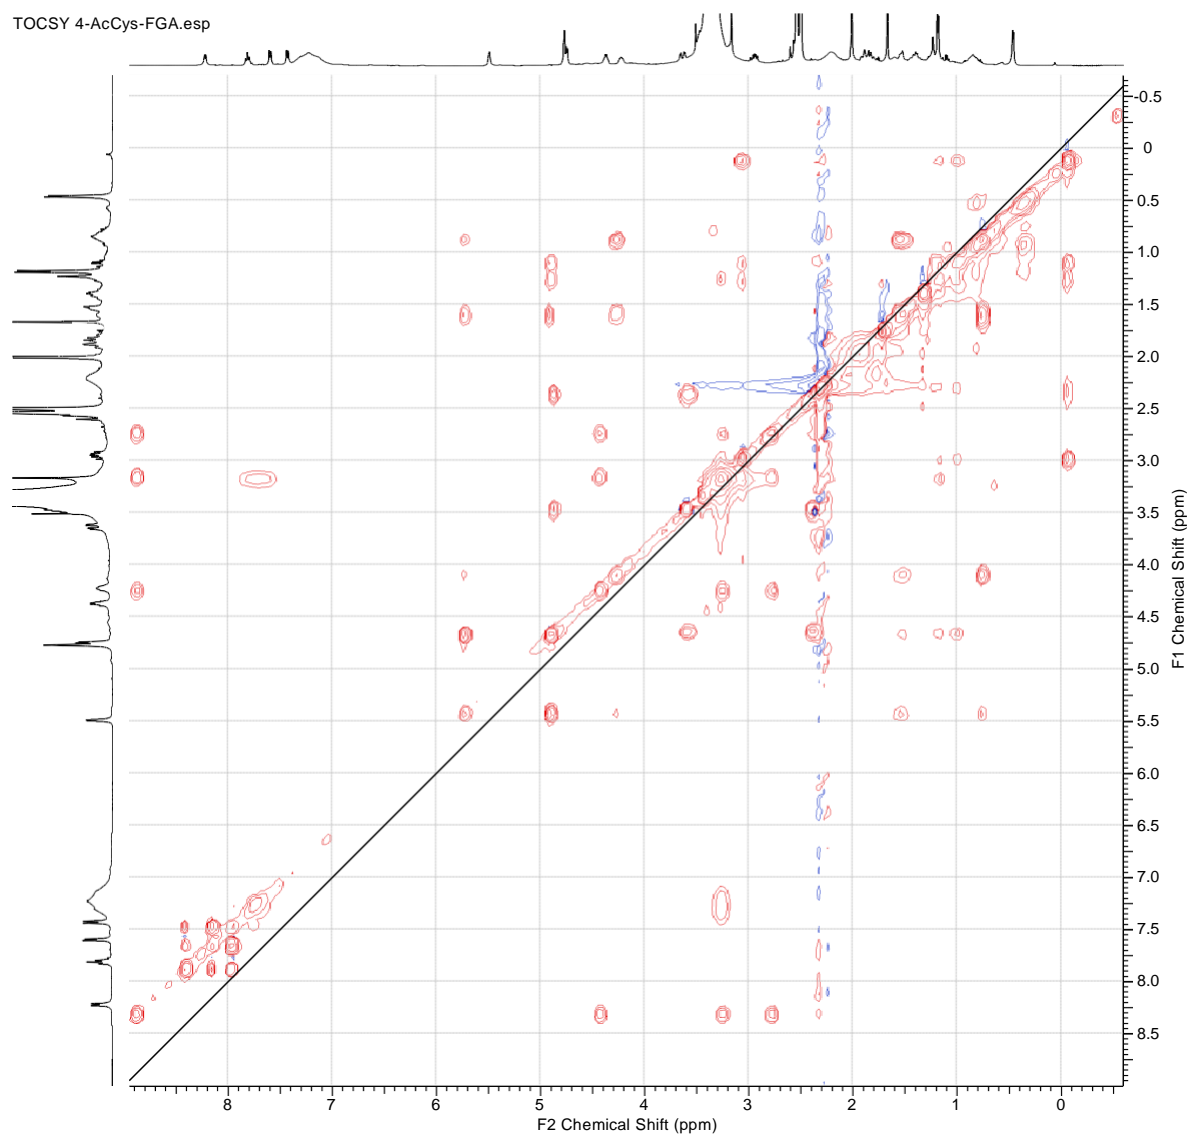

**Figure S15:** TOCSY spectrum (DMSO-*d*<sub>6</sub>, 500 MHz) of 4-AcCys-FGA (**2**)

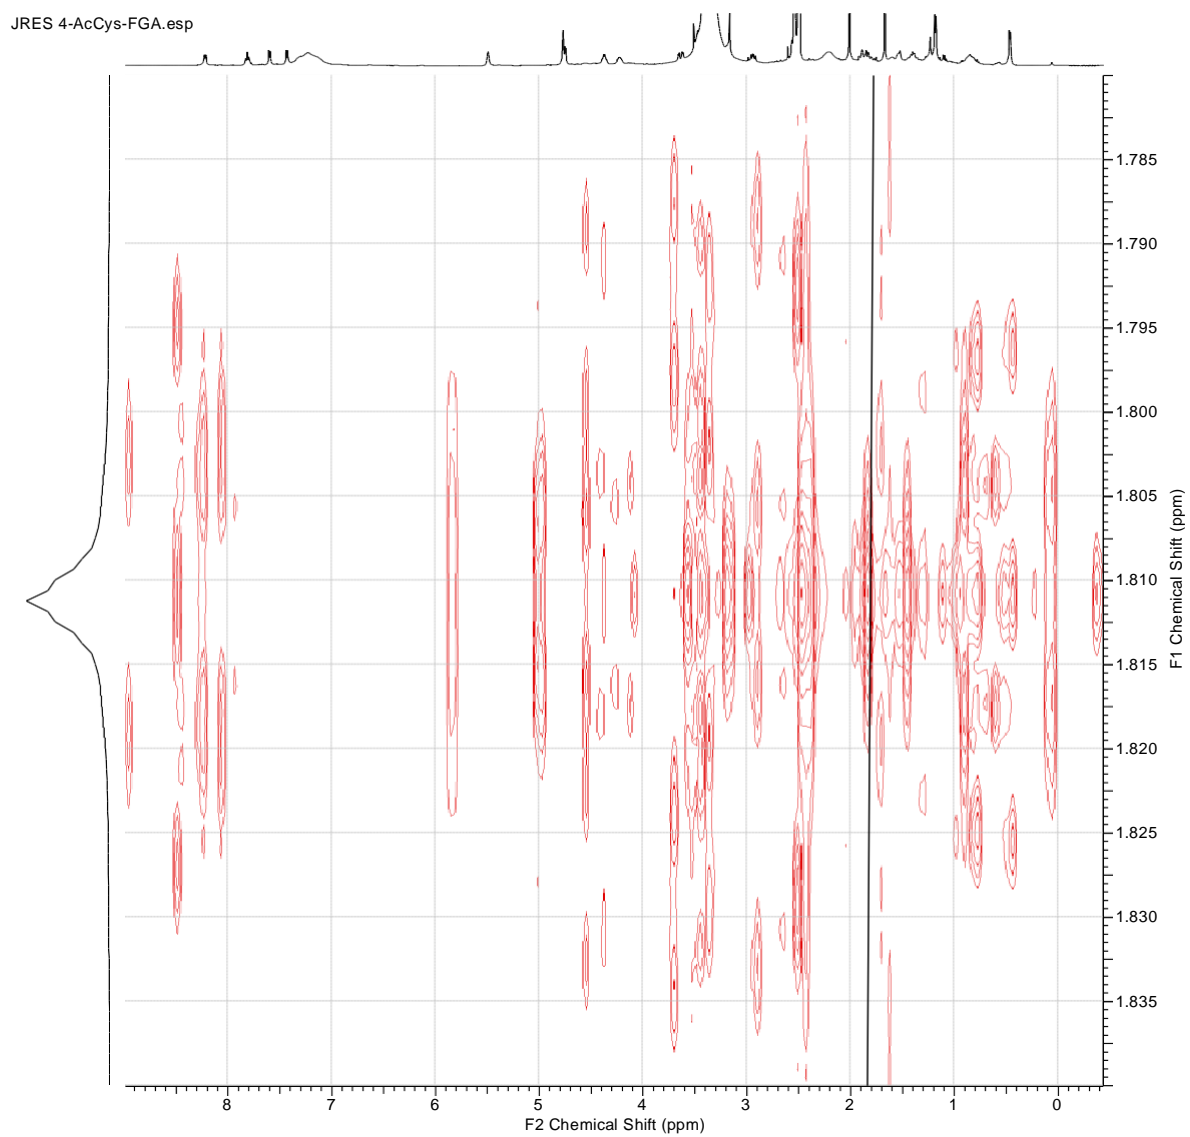

**Figure S16:** JRES spectrum (DMSO-*d*<sub>6</sub>, 500 MHz) of 4-AcCys-FGA (**2**)



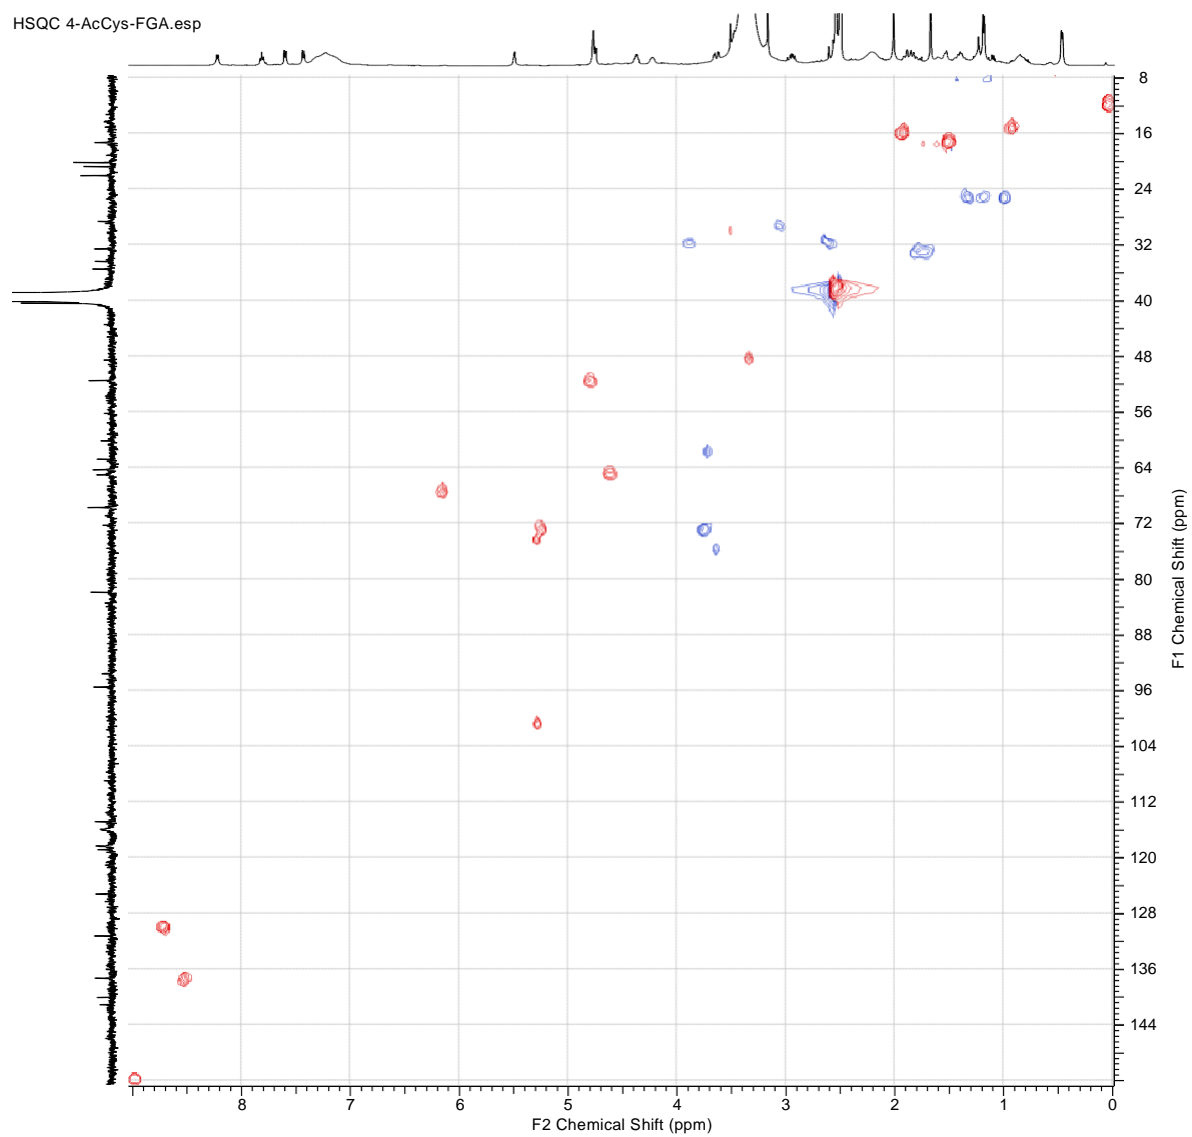

**Figure S17:** HSQC spectrum (DMSO-*d*<sub>6</sub>, 500 MHz) of 4-AcCys-FGA (**2**)

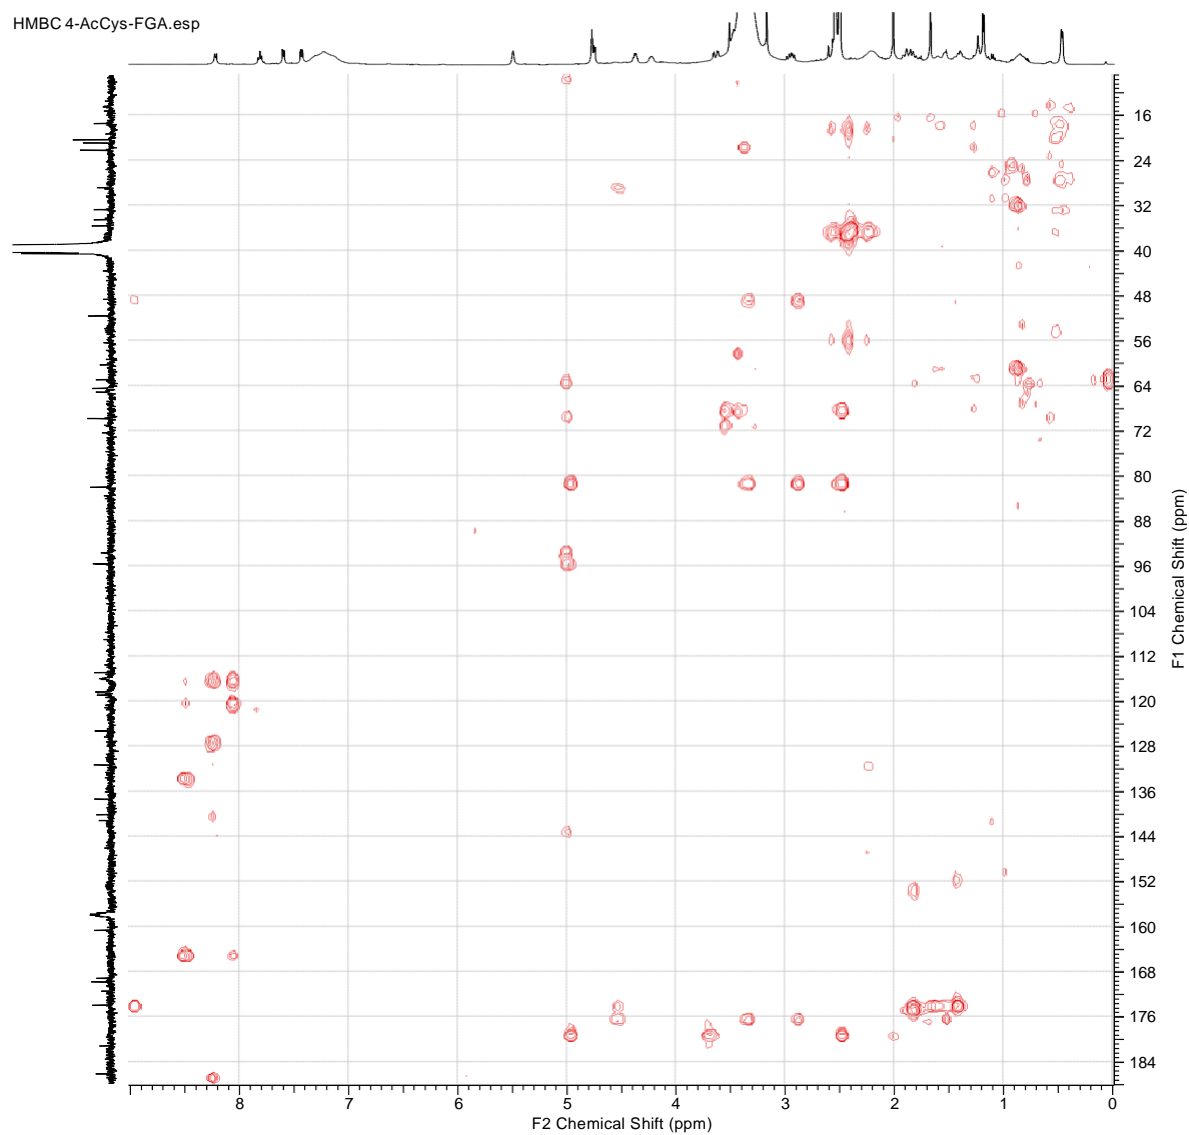

**Figure S18:** HMBC spectrum (DMSO-*d*<sub>6</sub>, 500 MHz) of 4-AcCys-FGA (2)

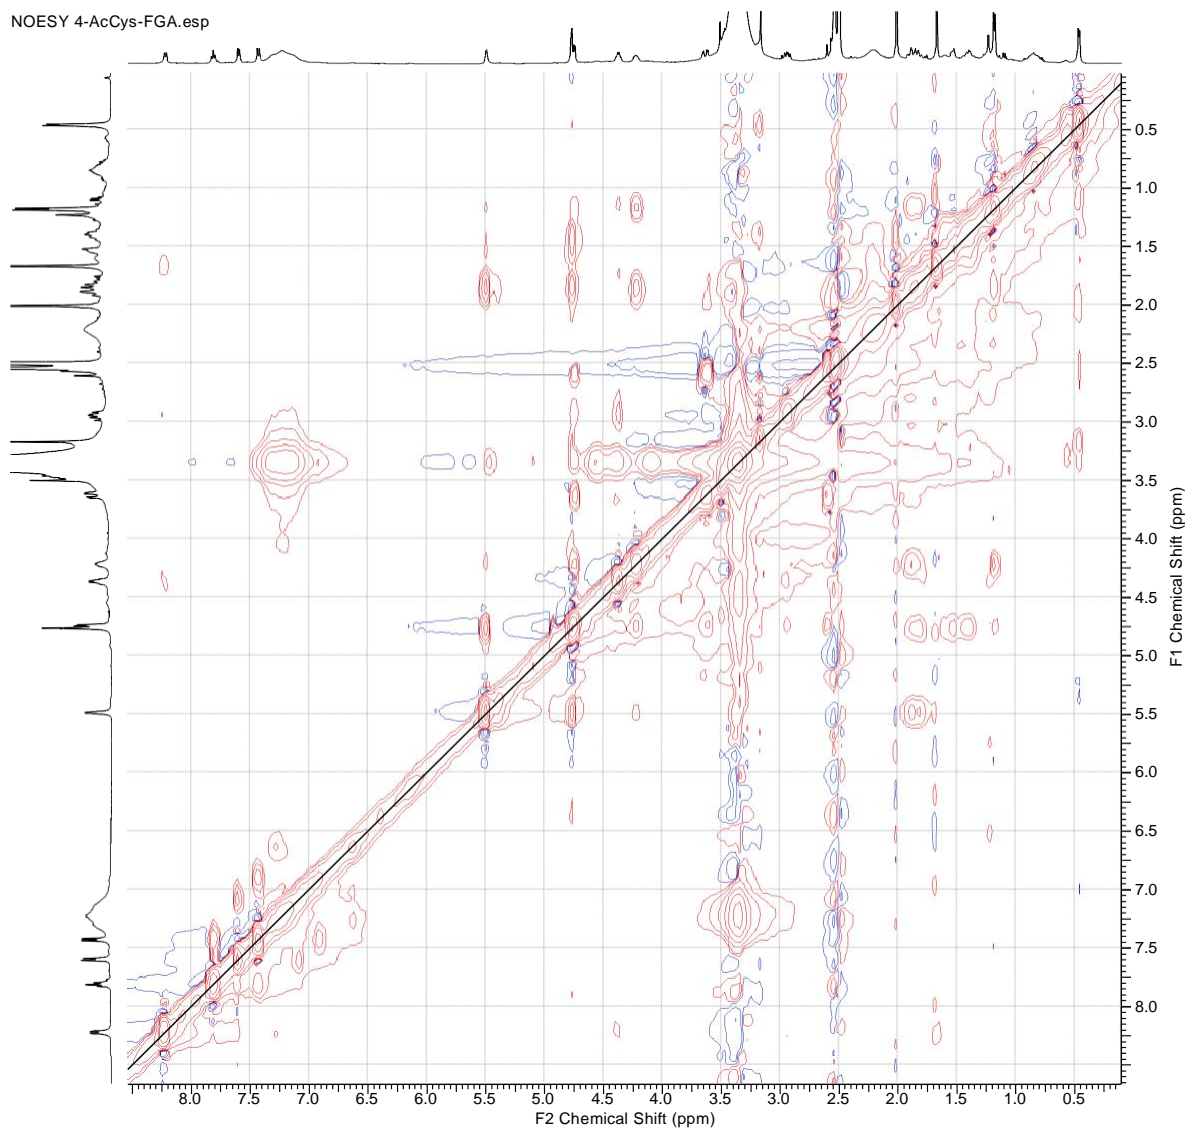

**Figure S19:** NOESY spectrum (DMSO-*d*<sub>6</sub>, 500 MHz) of 4-AcCys-FGA (**2**)

## References

1. [http://www.cheminfo.org/Spectra/NMR/Tools/Multiplet\\_simulator/index.html](http://www.cheminfo.org/Spectra/NMR/Tools/Multiplet_simulator/index.html).
2. T. D. W. Claridge, in *High-Resolution NMR Techniques in Organic Chemistry*, Elsevier, Oxford, 3rd edn, 2016, ch. 3, pp. 86–87.;

Supplementary information 2: Bioactivity testing

| Medina Sample ID | Row | Column | Compound ID                        | Conc. (µg/mL) | MSSA ATCC29213 |          |          |         |      |             | MRSA MB5393 |          |          |         |      |             |
|------------------|-----|--------|------------------------------------|---------------|----------------|----------|----------|---------|------|-------------|-------------|----------|----------|---------|------|-------------|
|                  |     |        |                                    |               | % INH 1:       | % INH 1: | % INH 1: | Average | STDV | MIC (µg/mL) | % INH 1:    | % INH 1: | % INH 1: | Average | STDV | MIC (µg/mL) |
| PL-HPP-000173-A1 | A   | 2      | CA-300354-a01-MR013-EC01-FS017-a01 | 128           | 13             | 3        | 4        | 6       | 5    | > 128       | 7           | 6        | 7        | 7       | 1    | > 128       |
|                  |     |        |                                    | 64            | 13             | -3       | 4        | 4       | 8    |             | 5           | 5        | 5        | 5       | 0    |             |
|                  |     |        |                                    | 32            | 6              | -6       | 12       | 4       | 9    |             | 4           | 5        | 4        | 4       | 1    |             |
|                  |     |        |                                    | 16            | 11             | -2       | 9        | 6       | 7    |             | 4           | 5        | 2        | 4       | 2    |             |
|                  |     |        |                                    | 8             | 10             | -6       | 30       | 11      | 19   |             | 2           | 9        | -2       | 3       | 5    |             |
|                  |     |        |                                    | 4             | 14             | -5       | 6        | 5       | 10   |             | 0           | 1        | 1        | 1       | 1    |             |
|                  |     |        |                                    | 2             | 10             | 31       | 6        | 15      | 13   |             | 2           | 3        | 2        | 2       | 0    |             |
|                  |     |        |                                    | 1             | 10             | -6       | 9        | 4       | 9    |             | 1           | 5        | 5        | 4       | 2    |             |
|                  |     |        |                                    | 0.5           | 8              | -18      | 16       | 2       | 18   |             | 3           | 4        | 4        | 4       | 0    |             |
|                  |     |        |                                    | 0.25          | 10             | -8       | 10       | 4       | 10   |             | 8           | 3        | 4        | 5       | 3    |             |

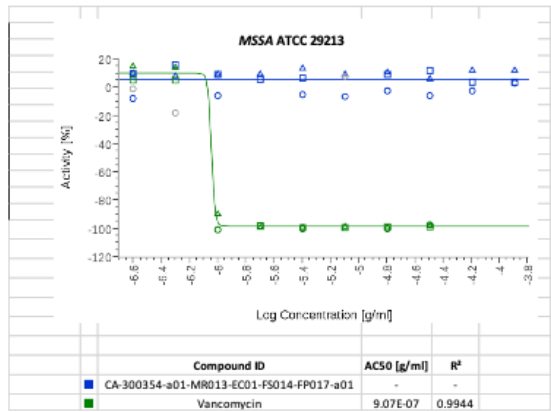

MIC > 128 µg/mL

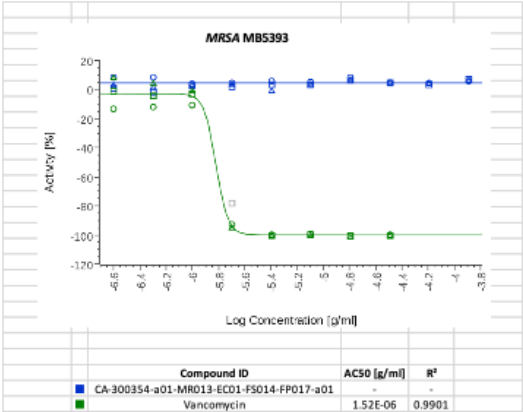

MIC > 128 µg/mL

**Figure S20:** Bioactivity testing of AcCys adduct **2** against MSSA and MRSA, showing no activity.

## Supplementary information 3: antiSMASH prediction

| Region      | Type                                                                                                                                                                                                                                                                                                                                                                                        | From      | To        | Most similar known cluster                                                                                                                                                                        |                                                     | Similarity |
|-------------|---------------------------------------------------------------------------------------------------------------------------------------------------------------------------------------------------------------------------------------------------------------------------------------------------------------------------------------------------------------------------------------------|-----------|-----------|---------------------------------------------------------------------------------------------------------------------------------------------------------------------------------------------------|-----------------------------------------------------|------------|
| Region 1.1  | NRPS  , T1PKS <br>, thiopeptide  , LAP                  | 65,689    | 131,653   | lactazole                                                                                                        | RiPP:Thiopeptide                                    | 33%        |
| Region 1.2  | terpene                                                                                                                                                                                                                                                                                                    | 146,756   | 170,148   | isorenieratene                                                                                                   | Terpene                                             | 100%       |
| Region 1.3  | T3PKS                                                                                                                                                                                                                                                                                                      | 261,468   | 302,057   | herboxidiene                                                                                                     | Polyketide                                          | 9%         |
| Region 1.4  | melanin                                                                                                                                                                                                                                                                                                    | 334,998   | 345,471   | melanin                                                                                                          | Other                                               | 100%       |
| Region 1.5  | bacteriocin                                                                                                                                                                                                                                                                                                | 528,172   | 536,427   |                                                                                                                                                                                                   |                                                     |            |
| Region 1.6  | T1PKS  , NRPS                                                                                                                                                                                                             | 550,446   | 598,095   | SGR PTMs                                                                                                         | NRP + Polyketide                                    | 100%       |
| Region 1.7  | linaridin                                                                                                                                                                                                                                                                                                  | 636,329   | 656,937   | pentostatine / vidarabine                                                                                        | Other                                               | 9%         |
| Region 1.8  | terpene                                                                                                                                                                                                                                                                                                    | 680,455   | 706,615   | hopene                                                                                                           | Terpene                                             | 69%        |
| Region 1.9  | NRPS                                                                                                                                                                                                                                                                                                       | 960,307   | 1,024,307 | nonactin                                                                                                         | Polyketide                                          | 92%        |
| Region 1.10 | arylpolyyene  , NRPS-like                                                                                                                                                                                                 | 1,032,426 | 1,075,207 | formicamycins A-M                                                                                                | Polyketide                                          | 11%        |
| Region 1.11 | NRPS                                                                                                                                                                                                                                                                                                       | 1,121,481 | 1,179,892 | asukamycin                                                                                                       | Polyketide:Type II                                  | 12%        |
| Region 1.12 | terpene                                                                                                                                                                                                                                                                                                    | 1,266,611 | 1,286,145 | 2-methylisoborneol                                                                                               | Terpene                                             | 100%       |
| Region 1.13 | bacteriocin                                                                                                                                                                                                                                                                                                | 1,304,256 | 1,315,587 |                                                                                                                                                                                                   |                                                     |            |
| Region 1.14 | butyrolactone                                                                                                                                                                                                                                                                                              | 1,476,959 | 1,486,500 |                                                                                                                                                                                                   |                                                     |            |
| Region 1.15 | siderophore                                                                                                                                                                                                                                                                                                | 1,640,684 | 1,652,888 | ficellomycin                                                                                                     | NRP                                                 | 3%         |
| Region 1.16 | terpene                                                                                                                                                                                                                                                                                                    | 2,080,278 | 2,095,401 |                                                                                                                                                                                                   |                                                     |            |
| Region 1.17 | lanthipeptide                                                                                                                                                                                                                                                                                              | 2,434,192 | 2,455,327 | AmfS                                                                                                             | RiPP:Lanthipeptide                                  | 100%       |
| Region 1.18 | T1PKS                                                                                                                                                                                                                                                                                                      | 2,745,040 | 2,809,370 | argimycin PI / argimycin PII / nigrifactin /<br>argimycin PIV / argimycin PV / argimycin<br>PVI / argimycin PIX  | Polyketide:Modular type I                           | 27%        |
| Region 1.19 | lassopeptide                                                                                                                                                                                                                                                                                               | 3,358,147 | 3,380,176 | keywimysin                                                                                                       | RiPP                                                | 100%       |
| Region 1.20 | T2PKS                                                                                                                                                                                                                                                                                                      | 3,435,730 | 3,506,864 | prejadomycin / rabelomycin / gaudimycin<br>C / gaudimycin D / UWM6 / gaudimycin A<br>                            | Polyketide:Type II +<br>Saccharide:Hybrid/tailoring | 27%        |
| Region 1.21 | betalactone                                                                                                                                                                                                                                                                                                | 4,047,261 | 4,074,934 | divergolide A / divergolide B / divergolide<br>C / divergolide D                                                 | Polyketide:Modular type I                           | 6%         |
| Region 1.22 | NRPS                                                                                                                                                                                                                                                                                                       | 4,421,087 | 4,484,173 | phosphonoglycans                                                                                                 | Saccharide                                          | 3%         |
| Region 1.23 | thiopeptide  , LAP                                                                                                                                                                                                      | 4,678,585 | 4,713,148 |                                                                                                                                                                                                   |                                                     |            |
| Region 1.24 | NRPS-like                                                                                                                                                                                                                                                                                                | 4,966,191 | 5,009,033 | bottromycin A2                                                                                                 | RiPP:Bottromycin                                    | 39%        |
| Region 1.25 | siderophore                                                                                                                                                                                                                                                                                              | 5,095,552 | 5,107,330 | desferrioxamin B                                                                                               | Other                                               | 100%       |
| Region 1.26 | lanthipeptide                                                                                                                                                                                                                                                                                            | 5,165,457 | 5,188,765 |                                                                                                                                                                                                   |                                                     |            |
| Region 1.27 | NRPS  , PKS-like                                                                                                                                                                                                      | 5,500,642 | 5,576,586 | decaplanin                                                                                                     | NRP:Glycopeptide                                    | 7%         |
| Region 1.28 | lassopeptide                                                                                                                                                                                                                                                                                             | 5,751,892 | 5,774,430 | albusnodin                                                                                                     | RiPP                                                | 100%       |
| Region 1.29 | ectoine                                                                                                                                                                                                                                                                                                  | 6,200,194 | 6,210,147 | ectoine                                                                                                        | Other                                               | 100%       |
| Region 1.30 | terpene                                                                                                                                                                                                                                                                                                  | 6,670,760 | 6,689,790 | steffimycin D                                                                                                  | Polyketide:Type II +<br>Saccharide:Hybrid/tailoring | 19%        |
| Region 1.31 | T2PKS                                                                                                                                                                                                                                                                                                    | 6,839,117 | 6,911,635 | hiroshidine                                                                                                    | Polyketide                                          | 41%        |
| Region 1.32 | T3PKS                                                                                                                                                                                                                                                                                                    | 7,216,064 | 7,257,182 | herboxidiene                                                                                                   | Polyketide                                          | 6%         |
| Region 1.33 | T1PKS  , NRPS                                                                                                                                                                                                         | 7,267,073 | 7,317,119 | arsono-polyketide                                                                                              | Polyketide                                          | 45%        |
| Region 1.34 | NRPS                                                                                                                                                                                                                                                                                                     | 7,326,987 | 7,375,242 | coelichelin                                                                                                    | NRP                                                 | 81%        |
| Region 1.35 | NRPS  , transAT-PKS<br> , T1PKS  , PKS-like<br> | 7,396,465 | 7,513,122 | streptobactin                                                                                                  | NRP                                                 | 94%        |
| Region 1.36 | terpene                                                                                                                                                                                                                                                                                                  | 7,521,039 | 7,543,252 | geosmin                                                                                                        | Terpene                                             | 100%       |
| Region 1.37 | butyrolactone                                                                                                                                                                                                                                                                                            | 7,572,437 | 7,583,324 | coelimycin P1                                                                                                  | Polyketide:Modular type I                           | 16%        |
| Region 1.38 | ectoine                                                                                                                                                                                                                                                                                                  | 7,674,984 | 7,685,385 |                                                                                                                                                                                                   |                                                     |            |
| Region 2.1  | terpene                                                                                                                                                                                                                                                                                                  | 21,647    | 42,699    | platencin                                                                                                      | Terpene                                             | 9%         |
| Region 2.2  | ectoine                                                                                                                                                                                                                                                                                                  | 245,190   | 255,600   | ectoine                                                                                                        | Other                                               | 50%        |
| Region 2.3  | T1PKS                                                                                                                                                                                                                                                                                                    | 302,669   | 348,989   | actinomycin D                                                                                                  | NRP                                                 | 10%        |

**Figure S21:** Prediction of biosynthetic regions in *Streptomyces* sp. CA-256286

## Supplementary information 4: Replicates and samples for omics analyses

**Table S1:** Replicates of strains CA-300354 (*Streptomyces* sp. CA-256286 with pRM4-SARPs) and CA-300355 (*Streptomyces* sp. CA-256286 with pRM4) harvested for proteomics and transcriptomics analyses, the number given in RNA purification and sequencing, and which replicates successfully resulted in data.

| Strain    | Replicate | Number in RNA purification | Proteomics | Transcriptomics |
|-----------|-----------|----------------------------|------------|-----------------|
| CA-300354 | A         | 11                         | Yes        | No              |
| CA-300354 | B         | 12                         | No         | Yes             |
| CA-300354 | C         | 13                         | Yes        | Yes             |
| CA-300354 | D         | 14                         | Yes        | Yes             |
| CA-300354 | E         | 15                         | Yes        | Yes             |
| CA-300355 | A         | 16                         | Yes        | Yes             |
| CA-300355 | B         | 17                         | Yes        | Yes             |
| CA-300355 | C         | 18                         | Yes        | Yes             |
| CA-300355 | D         | 19                         | Yes        | Yes             |
| CA-300355 | E         | 20                         | No         | No              |

## Supplementary information 5: Transcriptomics

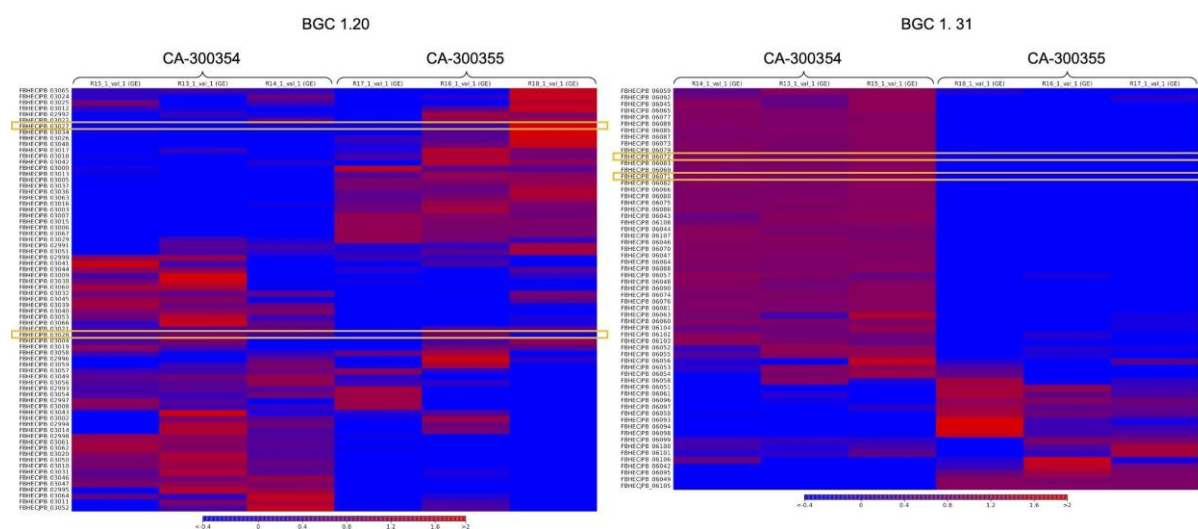

**Figure S22:** Heat maps of transcriptomics data for three replicates of each strain CA-300354 (*Streptomyces* sp. CA-256286 with pRM4-SARPs) and CA-300355 (*Streptomyces* sp. CA-256286 with pRM4) for all genes predicted in BGC 1.20 (FBHECJPB\_02990 to FBHECJPB\_03067) and 1.31 (FBHECJPB\_06042 to FBHECJPB\_06108). The colors represent expression levels, where red represents high and blue represents low expression. The two core type II PKS genes from each cluster are outlined in yellow. The data was analyzed with CLC Genomics with default parameters.

## Supplementary information 6: LC-MS analyses

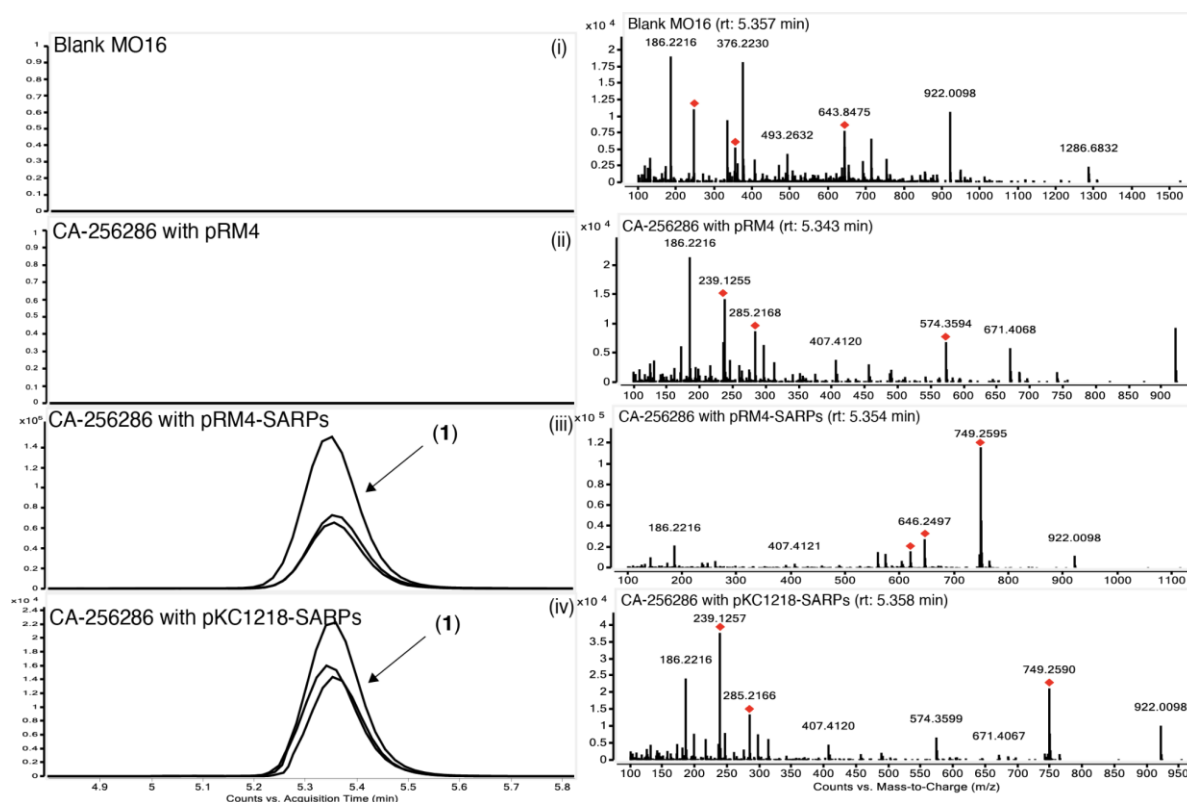

**Figure S23:** LC-MS analysis for the production of (1) in CA-300355 (CA-256286 with pRM4) (ii), CA-300354 (CA-256286 with pRM4-SARPs) (iii) and CA-256286 with pKC1218-SARPs (iv). Chromatogram (i) represents blank samples from MO16 medium (negative control). Replicates are displayed in overlaid mode. On the right from every EIC, a mass spectrum is extracted for approximate RT 5.35 min for one of the replicates.



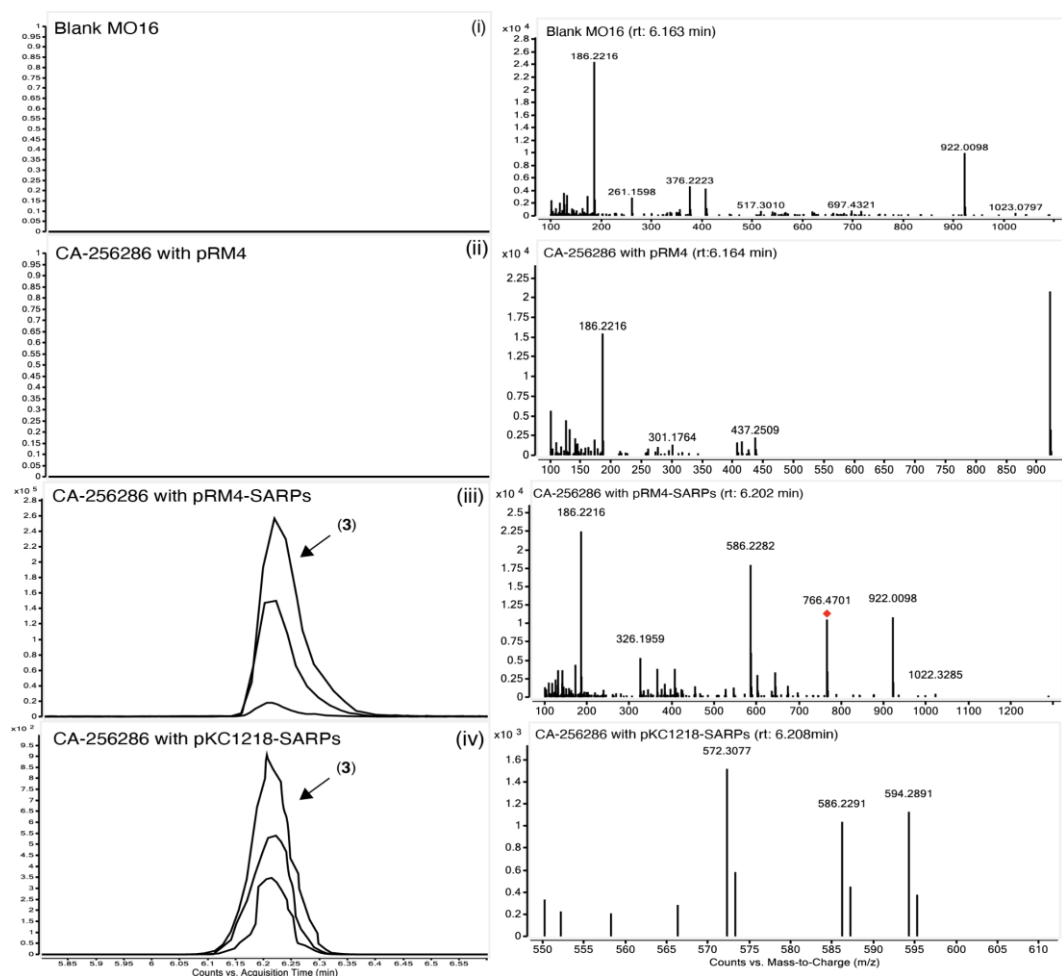

**Figure S24:** LC-MS analysis for the production of (3) in CA-300355 (CA-256286 with pRM4) (ii), CA-300354 (CA-256286 with pRM4-SARPs) (iii) and CA-256286 with pKC1218-SARPs (iv). Chromatogram (i) represents blank samples from MO16 medium (negative control). Replicates are displayed in overlaid mode. On the right from every EIC, a mass spectrum is extracted for approximate RT 6.21 min.

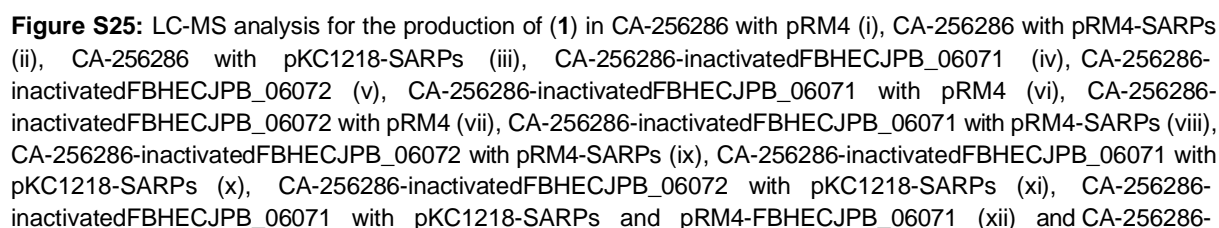

inactivatedFBHECJPB\_06072 with pKC1218-SARPs and pRM4-FBHECJPB\_06072(xiii). Replicates are displayed in overlaid mode. On the right from every EIC, a mass spectrum is extracted for approximate RT 5.35 min.

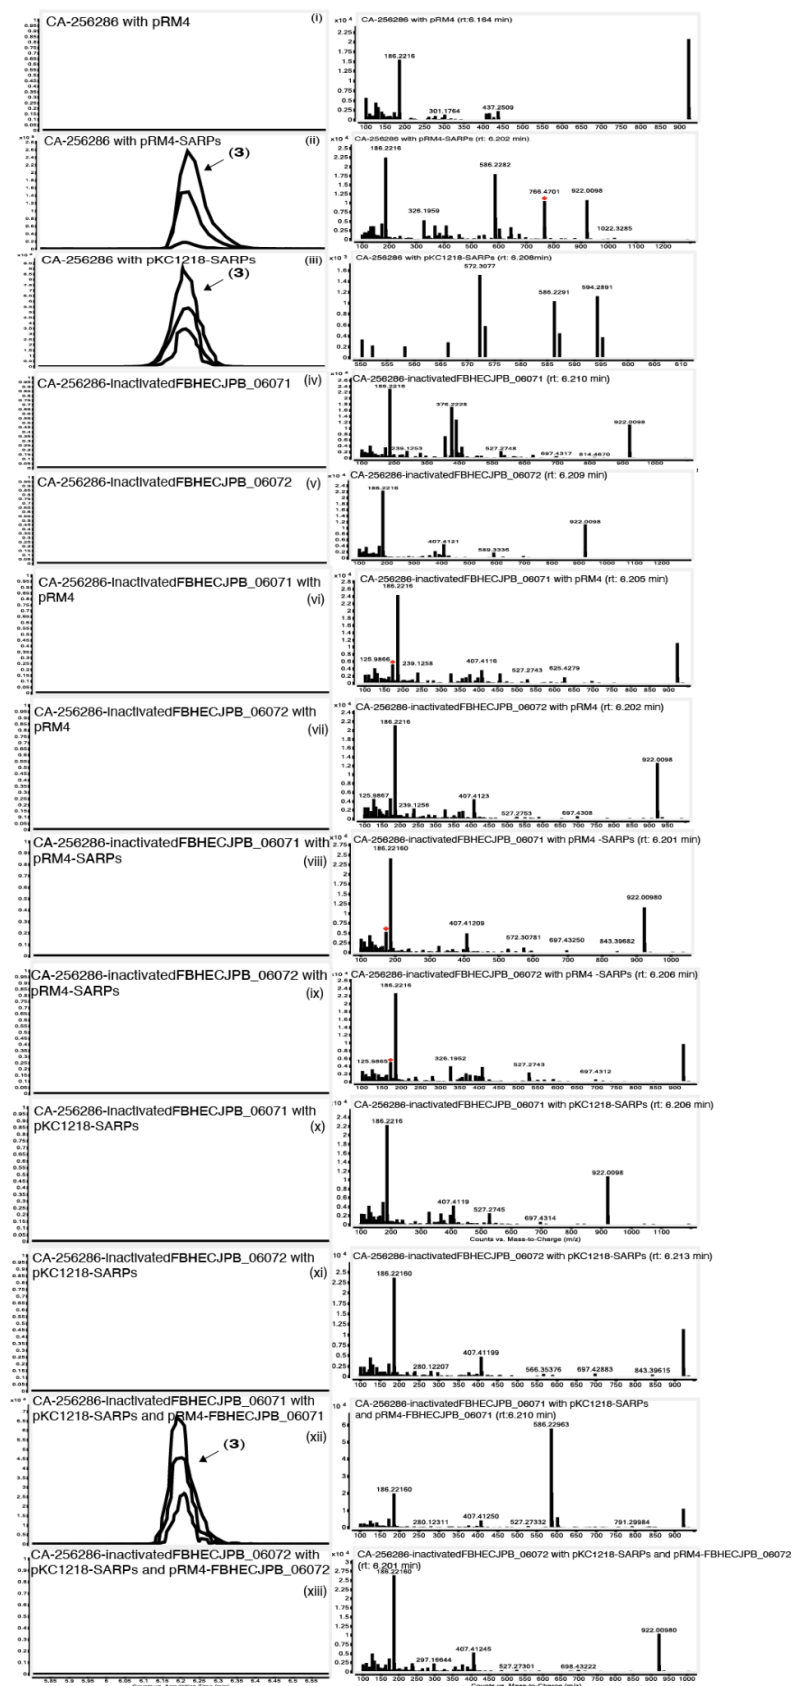

**Figure S26:** LC-MS analysis for the production of (3) in CA-256286 with pRM4 (i), CA-256286 with pRM4-SARPs

(ii), CA-256286 with pKC1218-SARPs (iii), CA-256286-inactivatedFBHECJPB\_06071 (iv), CA-256286-inactivatedFBHECJPB\_06072 (v), CA-256286-inactivatedFBHECJPB\_06071 with pRM4 (vi), CA-256286-inactivatedFBHECJPB\_06072 with pRM4 (vii), CA-256286-inactivatedFBHECJPB\_06071 with pRM4-SARPs (viii), CA-256286-inactivatedFBHECJPB\_06072 with pRM4-SARPs (ix), CA-256286-inactivatedFBHECJPB\_06071 with pKC1218-SARPs (x), CA-256286-inactivatedFBHECJPB\_06072 with pKC1218-SARPs (xi), CA-256286-inactivatedFBHECJPB\_06071 with pKC1218-SARPs and pRM4-FBHECJPB\_06071 (xii) and CA-256286-inactivatedFBHECJPB\_06072 with pKC1218-SARPs and pRM4-FBHECJPB\_06072(xiii). Replicates are displayed in overlaid mode. On the right from every EIC, a mass spectrum is extracted for approximate RT 6.20 min.

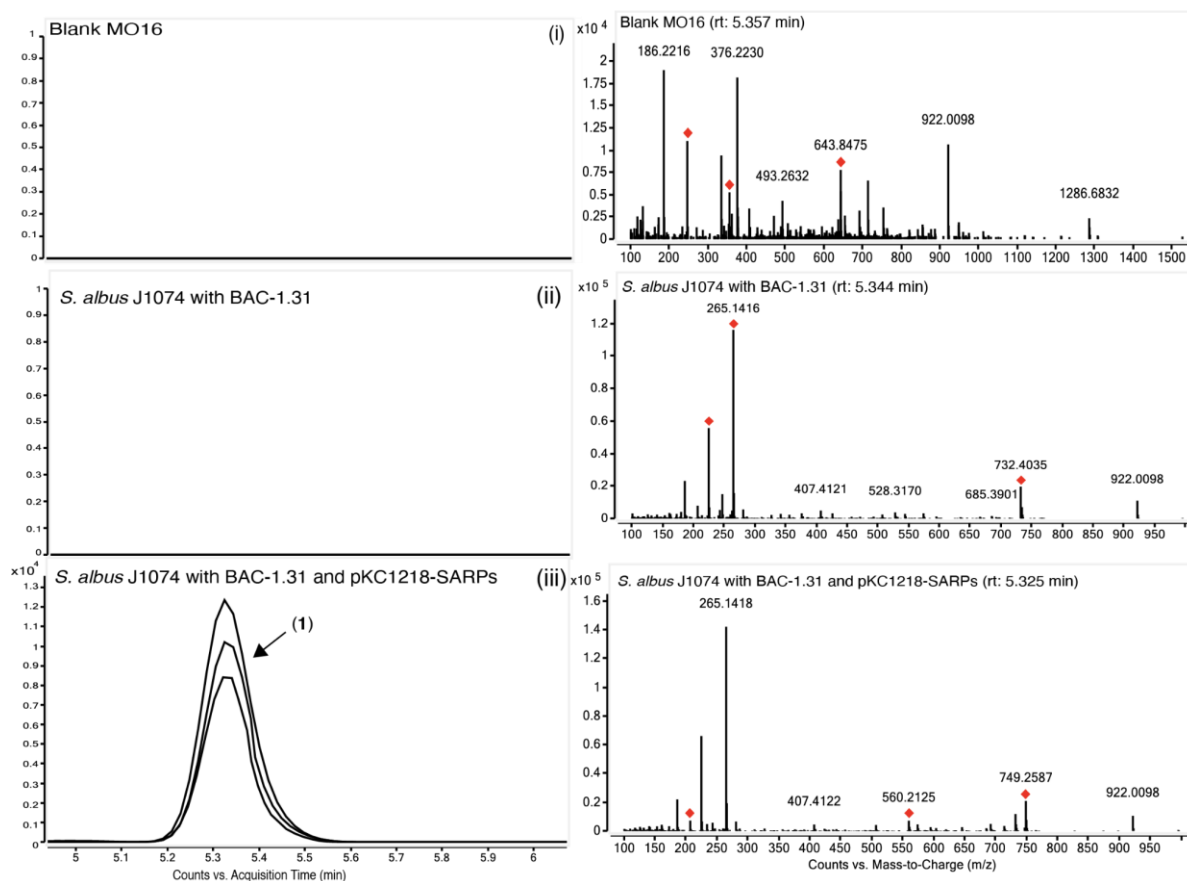

**Figure S27:** LC-MS analysis for the production of (1) in *S. albus* J1074 with BAC-1.31 (ii) and *S. albus* J1074 with BAC-1.31 and pKC1218-SARPs (iii). Chromatogram (i) represents blank samples from MO16 medium (negative control). Replicates are displayed in overlaid mode. On the right from every EIC, a mass spectrum is extracted for approximate RT 5.35 min for one of the replicates.

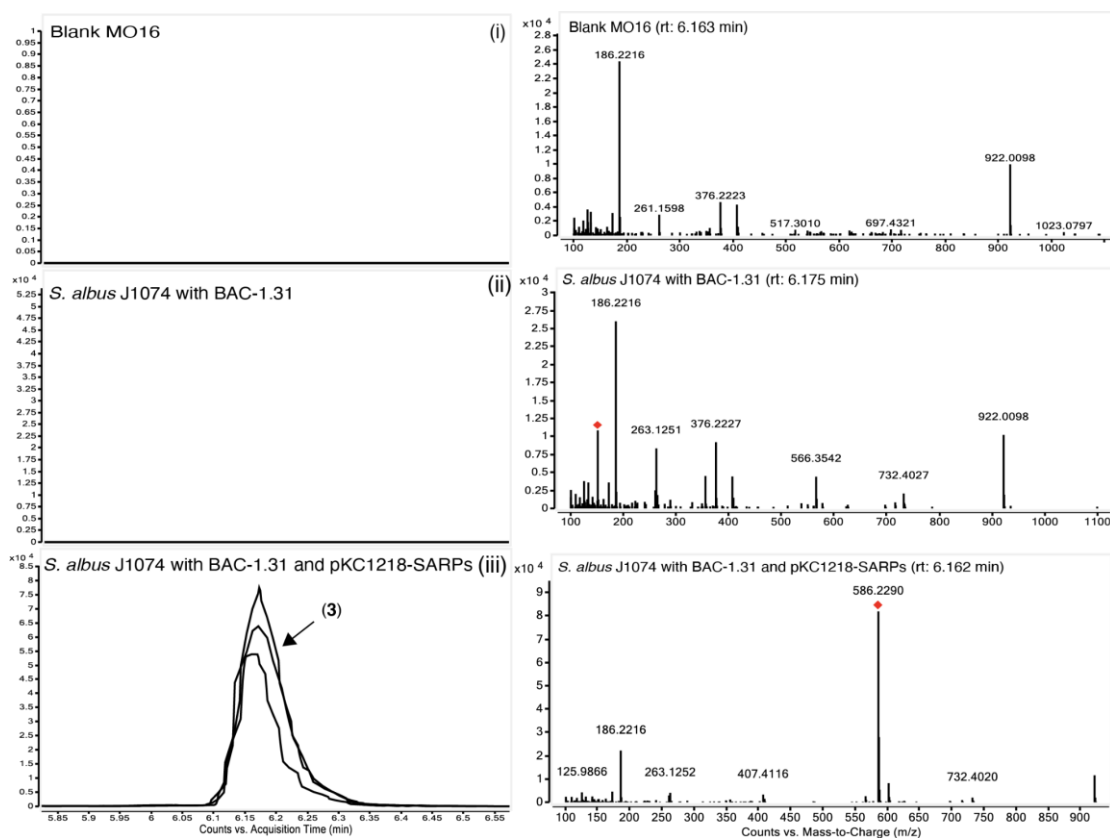

**Figure S28:** LC-MS analysis for the production of (3) in *S. albus* J1074 with BAC-1.31 (ii) and *S. albus* J1074 with BAC-1.31 and pKC1218-SARPs (iii). Chromatogram (i) represents blank samples from MO16 medium (negative control). Replicates are displayed in overlaid mode. On the right from every EIC, a mass spectrum is extracted for approximate RT 6.16 min for one of the replicates.

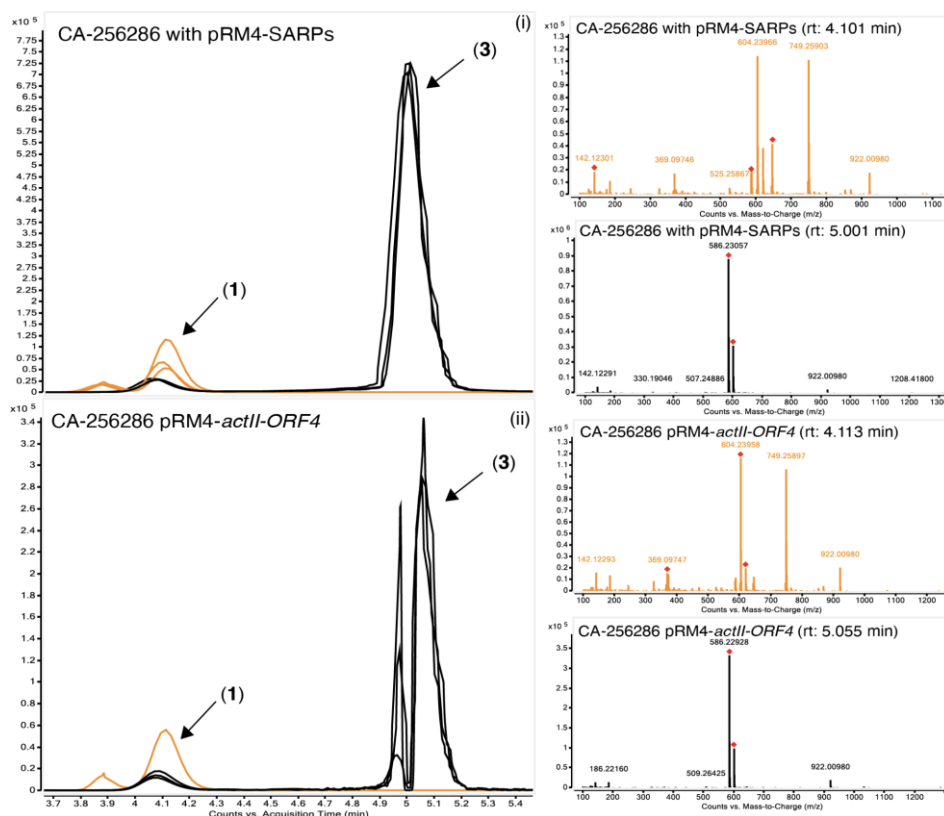

**Figure S29:** LC-MS analysis for the production of (1) and (3) in CA-256286 with pRM4-SARPs (i) and CA-256286 with pRM4-actII-ORF4. Replicates and the two different EICs are displayed in overlaid mode. On the right from every EIC, a mass spectrum is extracted for approximate RT 4.1 and 5.0 min for one of the replicates.

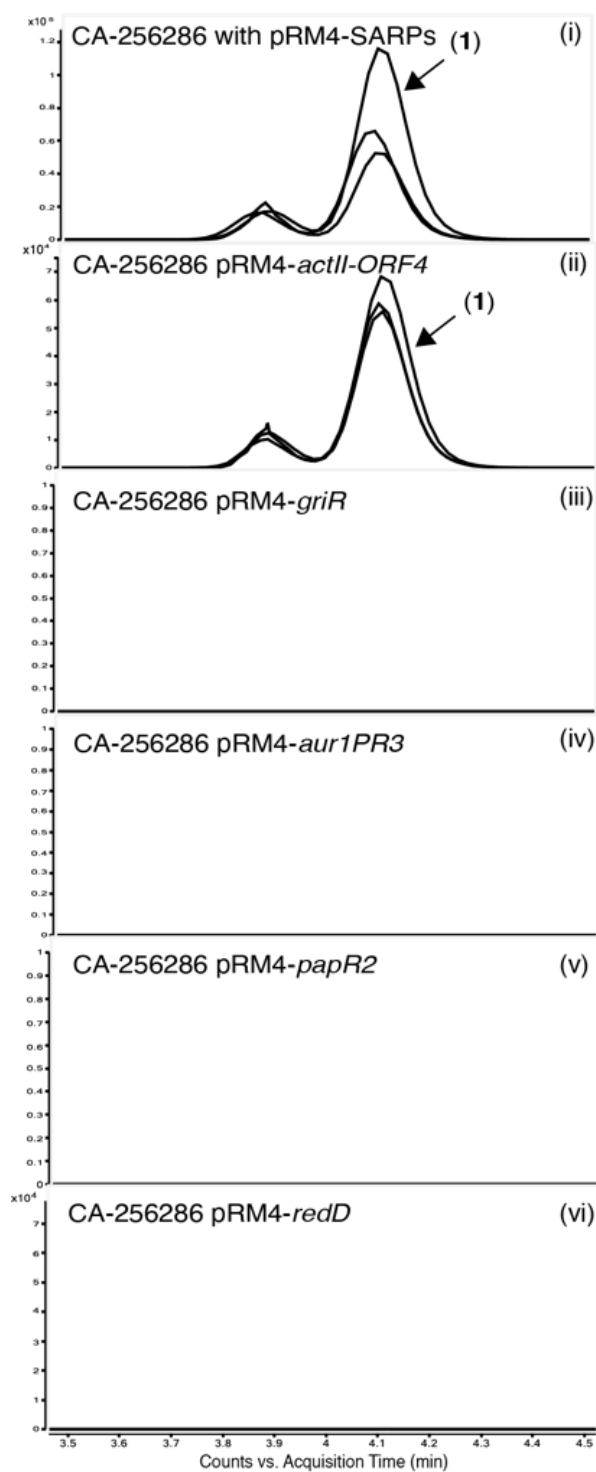

**Figure S30:** LC-MS analysis for the production of **(1)** in CA-256286 with pRM4-SARPs (i), CA-256286 with pRM4-*actII-ORF4* (ii), CA-256286 with pRM4-*griR* (iii), CA-256286 with pRM4-*aur1PR3* (iv), CA-256286 with pRM4-*papR2* (v) and CA-256286 with pRM4-*redD* (vi). Replicates are displayed in overlaid mode.

## Supplementary information 7: BLAST analyses

**Table S2:** BLAST against the genome of *Streptomyces albidoflavus* J1074 (ASM35952v1) using detoxification genes from *Streptomyces coelicolor*.

| Gene name                | Origin of the gene            | Best BLAST hit score                                      | Pairwise identity, % | E value           | Position, nt                                       |
|--------------------------|-------------------------------|-----------------------------------------------------------|----------------------|-------------------|----------------------------------------------------|
| <i>mshA</i><br>(SCO4204) | <i>S. coelicolor</i><br>A3(2) | 1393.49<br><br>No other significant hits                  | 82.2%                | 0                 | 3,825,507 -<br>3,826,907                           |
| <i>mshB</i><br>(SCO5126) | <i>S. coelicolor</i><br>A3(2) | 598.201<br><br>2 other hits, but of much<br>lower quality | 75.1%                | 4.95e-171         | 1,996,898 - 1,996,010                              |
| <i>mshC</i><br>(SCO1663) | <i>S. coelicolor</i><br>A3(2) | 1512.51<br><br>143.752                                    | 87.4%<br><br>71.7%   | 0<br><br>4.39e-34 | 5,860,358 - 5,861,583<br><br>2,935,694 - 2,935,432 |
| <i>mshD</i><br>(SCO4151) | <i>S. coelicolor</i><br>A3(2) | 825.426<br><br>One another hit, but of<br>low quality     | 79.9%                | 0                 | 3,750,284 - 3,749,361                              |
| Mca<br>(SCO4967)         | <i>S. coelicolor</i><br>A3(2) | 1081.5<br><br>64.404                                      | 87.2%<br><br>71.8%   | 0<br><br>2.40e-10 | 4,590,064 - 4,590,945<br><br>1996877 - 1996754     |



## Supplementary information 8: Biosynthesis of griseusins

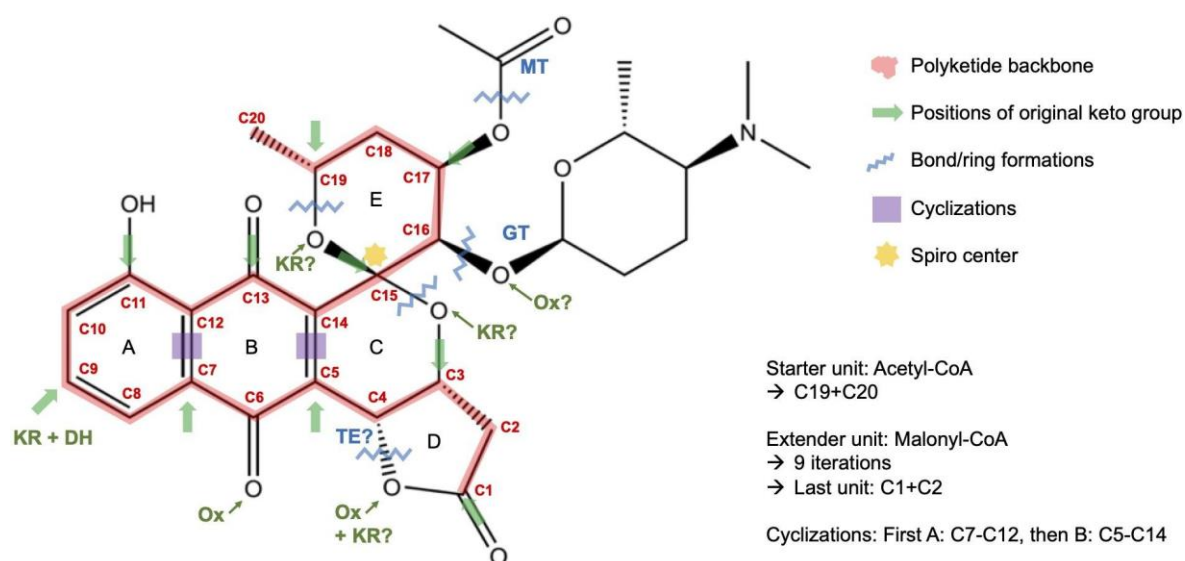

**Figure S31:** Schematic of proposed type II PKS features for biosynthesis of compound (**3**) 3'- O- $\alpha$ -D-forosaminy-griseusin A. KR: Ketoreductase, DH: Dehydratase, Ox: Oxidation, MT: Methyltransferase, GT: Glycosyltransferase.

## Supplementary information 9: BGC 1.31

**Table S3:** All genes from BGC 1.31 and their putative functions. The genes marked in green indicate genes we are convinced are involved, yellow indicates genes that might be involved and unmarked ones are unknown if they are involved. For each of the genes, it is registered whether the peptide was detected in proteomics analysis and whether the expression level was found to be significantly higher in strain *Streptomyces* sp. CA-256286 (pRM4-SARPs) than *Streptomyces* sp. CA-256286 (pRM4) in transcriptomics analysis.

| Locus tag Prokka | Locus tag NCBI | Nr. | Comment           | antiSMASH predicted putative function         | BLASTP top hit                                                                                   | Proteomics | Transcriptomics |
|------------------|----------------|-----|-------------------|-----------------------------------------------|--------------------------------------------------------------------------------------------------|------------|-----------------|
| FBHECJPB_06042   | JHY03_07500    | 1   |                   | SMC family ATPase                             | AAA family ATPase [Streptomyces sp. MBT58]                                                       |            |                 |
| FBHECJPB_06043   | JHY03_07490    | 2   |                   | Lrp/AsnC family transcriptional regulator     | MULTISPECIES: Lrp/AsnC family transcriptional regulator [Streptomyces]                           |            | X               |
| FBHECJPB_06044   | JHY03_07480    | 3   | Sulfurtransferase | sulfurtransferase                             | MULTISPECIES: rhodanese-like domain-containing protein [Streptomyces]                            |            | X               |
| FBHECJPB_06045   | JHY03_07470    | 4   |                   | hypothetical protein                          | DUF885 domain-containing protein [Streptomyces sp. NRRL S-623]                                   |            | X               |
| FBHECJPB_06046   | JHY03_07460    | 5   |                   | Lrp/AsnC family transcriptional regulator     | MULTISPECIES: Lrp/AsnC family transcriptional regulator [Streptomyces]                           |            | X               |
| FBHECJPB_06047   | JHY03_07450    | 6   |                   | cystathionine gamma-synthase                  | MULTISPECIES: PLP-dependent transferase [Streptomyces]                                           | X          | X               |
| FBHECJPB_06048   | JHY03_07440    | 7   |                   | GNAT family N-acetyltransferase               | MULTISPECIES: GNAT family N-acetyltransferase [Streptomyces]                                     |            | X               |
| FBHECJPB_06049   | JHY03_07430    | 8   |                   | hypothetical protein                          | hypothetical protein [Streptomyces fulvissimus]                                                  |            |                 |
| FBHECJPB_06050   | JHY03_07420    | 9   |                   | SWIM zinc finger family protein               | MULTISPECIES: SWIM zinc finger family protein [Streptomyces]                                     |            |                 |
| FBHECJPB_06051   | JHY03_07410    | 10  |                   | alkaline phosphatase                          | MULTISPECIES: alkaline phosphatase D family protein [Streptomyces]                               |            |                 |
| FBHECJPB_06052   | JHY03_07400    | 11  |                   | PLP-dependent aminotransferase family protein | aminotransferase class I/II-fold pyridoxal phosphate-dependent enzyme [Streptomyces fulvissimus] |            | X               |
| FBHECJPB_06053   | JHY03_07390    | 12  |                   | hypothetical protein                          | hypothetical protein YUYDRAFT_03072 [Streptomyces sp. ScaeMP-e48]                                |            |                 |
| FBHECJPB_06054   | JHY03_07380    | 13  |                   | alpha/beta fold hydrolase                     | MULTISPECIES: alpha/beta fold hydrolase [Streptomyces]                                           |            |                 |
| FBHECJPB_06055   | JHY03_07370    | 14  |                   | sigma-70 family RNA polymerase sigma factor   | RNA polymerase sigma factor SigJ [Streptomyces sp. MBT57]                                        |            | X               |
| FBHECJPB_06056   | JHY03_07360    | 15  |                   | GntR family transcriptional regulator         | MULTISPECIES: GntR family transcriptional regulator [Streptomyces]                               | X          |                 |
| FBHECJPB_06057   | JHY03_07350    | 16  |                   | ROK family transcriptional regulator          | ROK family protein [Streptomyces luridiscabiei]                                                  |            | X               |

(Table continued)

|                        |                     |    |                                                       |                                                                   |                                                                                           |   |   |
|------------------------|---------------------|----|-------------------------------------------------------|-------------------------------------------------------------------|-------------------------------------------------------------------------------------------|---|---|
| FBHECJPB_06058         | JHY03_07340         | 17 |                                                       | hypothetical protein                                              | MULTISPECIES: hypothetical protein [Streptomyces]                                         |   |   |
| FBHECJPB_06059         | JHY03_07330         | 18 |                                                       | G/U mismatch-specific DNA glycosylase                             | MULTISPECIES: G/U mismatch-specific DNA glycosylase [Streptomyces]                        |   |   |
| FBHECJPB_06060         | JHY03_07320         | 19 |                                                       | adenylosuccinate lyase                                            | adenylosuccinate lyase [Streptomyces microflavus]                                         | X | X |
| FBHECJPB_06061         | JHY03_07310         | 20 |                                                       | TetR family transcriptional regulator                             | MULTISPECIES: TetR family transcriptional regulator [Streptomyces]                        |   |   |
| FBHECJPB_06062 / qor   | JHY03_07300 / qor   | 21 | Oxidoreductase                                        | NADPH:quinone reductase-dependent oxidoreductase                  | zinc-binding dehydrogenase [Streptomyces sp. 2R]                                          | X | X |
| FBHECJPB_06063         | JHY03_07290         | 22 | Exporter                                              | export protein                                                    | MULTISPECIES: multidrug efflux MFS transporter [Streptomyces]                             |   | X |
| FBHECJPB_06064         | JHY03_07280         | 23 | KR                                                    | sorbitol utilization protein SOU2                                 | MULTISPECIES: SDR family oxidoreductase [Streptomyces]                                    | X | X |
| FBHECJPB_06065         | JHY03_07270         | 24 | Glycosyl transferase                                  | glycosyl transferase family protein                               | MULTISPECIES: DUF1205 domain-containing protein [Streptomyces]                            | X | X |
| FBHECJPB_06066         | JHY03_07260         | 25 |                                                       | hypothetical protein                                              | MULTISPECIES: hypothetical protein [Streptomyces]                                         |   | X |
| FBHECJPB_06067 / desVI | JHY03_07250 / desVI | 26 | Methyltransferase Similar to SpnS dimethyltransferase | dTDP-3-amino-3,4, 6-trideoxy-alpha-D-glucopyranose                | MULTISPECIES: class I SAM-dependent methyltransferase [Streptomyces]                      | X | X |
| FBHECJPB_06068 / rfbA  | JHY03_07240 / rfbA  | 27 | Thymidyltransferase                                   | glucose-1-phosphate thymidyltransferase                           | MULTISPECIES: glucose-1-phosphate thymidyltransferase RfbA [Streptomyces]                 |   | X |
| FBHECJPB_06069         | JHY03_07230         | 28 | Cyclase CYC C7-C12                                    | actinorhodin polyketide synthase bifunctional cyclase/dehydratase | hypothetical protein BEH93_30180 [Streptomyces sp. 2R]                                    | X | X |
| FBHECJPB_06070         | JHY03_07220         | 29 | ACP                                                   | acyl carrier protein                                              | MULTISPECIES: acyl carrier protein [Streptomyces]                                         | X | X |
| FBHECJPB_06071         | JHY03_07210         | 30 | Core type II PKS                                      | ketosynthase chain-length factor                                  | MULTISPECIES: ketosynthase chain-length factor [unclassified Streptomyces]                | X | X |
| FBHECJPB_06072         | JHY03_07200         | 31 | Core type II PKS                                      | beta-ketoacyl-[acyl-carrier-protein] synthase family protein      | MULTISPECIES: beta-ketoacyl-[acyl-carrier-protein] synthase family protein [Streptomyces] | X | X |
| FBHECJPB_06073         | JHY03_07190         | 32 | Thioesterase                                          | thioesterase                                                      | MULTISPECIES: thioesterase [Streptomyces]                                                 | X | X |
| FBHECJPB_06074         | JHY03_07180         | 33 | Oxidoreductase                                        | NADPH-dependent oxidoreductase                                    | MULTISPECIES: NAD(P)H-dependent oxidoreductase [Streptomyces]                             |   | X |

(Table continued)

|                       |                    |    |                                                    |                                                                        |                                                                                                  |   |   |
|-----------------------|--------------------|----|----------------------------------------------------|------------------------------------------------------------------------|--------------------------------------------------------------------------------------------------|---|---|
| FBHECJPB_06075        | JHY03_07170        | 34 |                                                    | hypothetical protein                                                   | MULTISPECIES: 4'-phosphopantetheinyl transferase superfamily protein [unclassified Streptomyces] |   | X |
| FBHECJPB_06076        | JHY03_07160        | 35 | Similar to SpnO dehydratase                        | NDP-hexose 2,3-dehydratase                                             | MULTISPECIES: NDP-hexose 2,3-dehydratase family protein [unclassified Streptomyces]              |   | X |
| FBHECJPB_06077        | JHY03_07150        | 36 | Similar to SpnN ketoreductase                      | Gfo/ldh/MocA family oxidoreductase                                     | Gfo/ldh/MocA family oxidoreductase [Streptomyces sp. 2R]                                         | X | X |
| FBHECJPB_06078 / rfbH | JHY03_07140 / rfbH | 37 | Similar to SpnQ dehydratase                        | lipopolysaccharide biosynthesis protein RfbH                           | MULTISPECIES: lipopolysaccharide biosynthesis protein RfbH [Streptomyces]                        | X | X |
| FBHECJPB_06079        | JHY03_07130        | 38 | Cyclase CYC C5-C14                                 | cyclase                                                                | MULTISPECIES: MBL fold metallo-hydrolase [Streptomyces]                                          |   | X |
| FBHECJPB_06080        | JHY03_07120        | 39 | SARP                                               | regulatory protein                                                     | MULTISPECIES: AfsR/SARP family transcriptional regulator [Streptomyces]                          | X | X |
| FBHECJPB_06081        | JHY03_07110        | 40 |                                                    | hydrolase                                                              | MULTISPECIES: acyl-CoA dehydrogenase family protein [Streptomyces]                               | X | X |
| FBHECJPB_06082        | JHY03_07100        | 41 | CYC C1-C18/C2-C19 (does not fit)                   | nuclear transport factor 2 family protein                              | MULTISPECIES: nuclear transport factor 2 family protein [Streptomyces]                           | X | X |
| FBHECJPB_06083        | JHY03_07090        | 42 | Oxidoreductase                                     | luciferase family protein                                              | MULTISPECIES: LLM class flavin-dependent oxidoreductase [Streptomyces]                           |   | X |
| FBHECJPB_06084 / hcaB | JHY03_07080 / hcaB | 43 | KR                                                 | 3-phenylpropionate-dihydrodiol/cinnamic acid-dihydrodiol dehydrogenase | MULTISPECIES: SDR family oxidoreductase [Streptomyces]                                           | X | X |
| FBHECJPB_06085        | JHY03_07070        | 44 | Acyltransferase                                    | acyltransferase                                                        | MULTISPECIES: acyltransferase [unclassified Streptomyces]                                        |   | X |
| FBHECJPB_06086        | JHY03_07060        | 45 | Oxidoreductase / KR                                | short chain dehydrogenase                                              | MULTISPECIES: SDR family NAD(P)-dependent oxidoreductase [Streptomyces]                          | X | X |
| FBHECJPB_06087        | JHY03_07050        | 46 | Cyclase CYC C7-C12 (similar to S. griseus cyclase) | actinorhodin polyketide synthase bifunctional cyclase/dehydratase      | SRPBCC family protein [Streptomyces sp. 2R]                                                      | X | X |
| FBHECJPB_06088        | JHY03_07040        | 47 | KR (similar to S. griseus KR)                      | SDR family NAD(P)-dependent oxidoreductase                             | MULTISPECIES: 3-oxoacyl-ACP reductase FabG [Streptomyces]                                        | X | X |
| FBHECJPB_06089        | JHY03_07030        | 48 | Aminotranferase, similar to SpnR transaminase      | DegT/DnrJ/EryC1/StrS family aminotransferase                           | MULTISPECIES: DegT/DnrJ/EryC1/StrS family aminotransferase [Streptomyces]                        | X | X |
| FBHECJPB_06090        | JHY03_07020        | 49 | SARP                                               | transcriptional regulator                                              | AfsR/SARP family transcriptional regulator [Streptomyces sp. 2R]                                 | X | X |
| FBHECJPB_06091 / rfbB | JHY03_07010 / rfbB | 50 | Dehydratase                                        | dTDP-glucose 4,6-dehydratase                                           | MULTISPECIES: dTDP-glucose 4,6-dehydratase [Streptomyces]                                        | X | X |

(Table continued)

|                |             |    |                   |                                                         |                                                                                  |   |   |
|----------------|-------------|----|-------------------|---------------------------------------------------------|----------------------------------------------------------------------------------|---|---|
| FBHECJPB_06092 | JHY03_07000 | 51 |                   | SGNH/GDSL hydrolase family protein                      | MULTISPECIES: SGNH/GDSL hydrolase family protein [unclassified Streptomyces]     |   | X |
| FBHECJPB_06093 | JHY03_06990 | 52 |                   | HlyC/CorC family transporter                            | MULTISPECIES: HlyC/CorC family transporter [Streptomyces]                        |   |   |
| FBHECJPB_06094 | JHY03_06980 | 53 |                   | HlyC/CorC family transporter                            | DUF21 domain-containing protein [Streptomyces sp. MBT58]                         |   |   |
| FBHECJPB_06095 | JHY03_06970 | 54 |                   | GNAT family N-acetyltransferase                         | MULTISPECIES: GNAT family N-acetyltransferase [Streptomyces]                     |   |   |
| FBHECJPB_06096 | JHY03_06960 | 55 |                   | toxin-antitoxin system HicB family antitoxin            | MULTISPECIES: hypothetical protein [Streptomyces]                                |   |   |
| FBHECJPB_06097 | JHY03_06950 | 56 |                   | hypothetical protein                                    | MULTISPECIES: hypothetical protein [Streptomyces]                                |   |   |
| FBHECJPB_06098 | JHY03_06940 | 57 | Methyltransferase | class I SAM-dependent methyltransferase                 | methyltransferase domain-containing protein [Streptomyces sp. MBT58]             |   |   |
| FBHECJPB_06099 | JHY03_06930 | 58 |                   | ATP-dependent dethiobiotin synthetase BioD              | ATP-dependent dethiobiotin synthetase BioD [Streptomyces sp. MBT58]              |   |   |
| FBHECJPB_06100 | JHY03_06920 | 59 | SAM transaminase  | adenosylmethionine--8-amino-7-oxononanoate transaminase | adenosylmethionine--8-amino-7-oxononanoate transaminase [Streptomyces sp. MBT58] | X |   |
| FBHECJPB_06101 | JHY03_06910 | 60 |                   | biotin synthase                                         | biotin synthase BioB [Streptomyces sp. NRRL S-623]                               | X |   |
| FBHECJPB_06102 | JHY03_06900 | 61 |                   | 8-amino-7-oxononanoate synthase                         | MULTISPECIES: 8-amino-7-oxononanoate synthase [Streptomyces]                     |   | X |
| FBHECJPB_06103 | JHY03_06890 | 62 |                   | hypothetical protein                                    | MULTISPECIES: DUF397 domain-containing protein [Streptomyces]                    |   | X |
| FBHECJPB_06104 | JHY03_06880 | 63 |                   | XRE family transcriptional regulator                    | DNA-binding protein [Streptomyces fulvissimus DSM 40593]                         |   | X |
| FBHECJPB_06105 | JHY03_06870 | 64 |                   | ATP-binding protein                                     | MULTISPECIES: ATP-binding protein [Streptomyces]                                 |   |   |
| FBHECJPB_06106 | JHY03_06860 | 65 |                   | LysR family transcriptional regulator                   | MULTISPECIES: LysR family transcriptional regulator [Streptomyces]               |   |   |
| FBHECJPB_06107 | JHY03_06850 | 66 |                   | LysE family translocator                                | MULTISPECIES: LysE family translocator [Streptomyces]                            |   | X |
| FBHECJPB_06108 | JHY03_06840 | 67 |                   | NlpC/P60 family protein                                 | MULTISPECIES: C40 family peptidase [Streptomyces]                                |   | X |
